# Supplementary material for: Functional dichotomy in spinal- vs prefrontal-projecting locus coeruleus modules splits descending noradrenergic analgesia from ascending aversion and anxiety in rats
Source: eLife. 2017 Oct 13;6:e29808. doi: 10.7554/eLife.29808 (PMC5653237; doi:10.7554/eLife.29808)
Supplement: Figure 1—source data 1. [file elife-29808-fig1-data1.xlsx]

## Sheet: Figure 1 B + C
Figure 1 B:		Dissector counts and DBH co-expression for EGFP labelled LC neurons after transduction with LV:PRS-EGFP-2a-PSAM
	Dissector formula:						Where N is the estimated number of cells and C the sum of all counted cells.
							The volume fraction is the product of ssf (section sampling factor),									ssf (1:4)		0.25		hsf = dissector volume (12um) / section thickness post processing (18+/-0.7um)
							hsf (hight sampling factor) and asf (area sampling fraction).									hsf		0.666667
							Because all EGFP positive neurons in the LC area were counted the area									asf		N/A
							sampling fraction was omitted from the volume fraction.									volume fraction		0.166667
																Dissector factor		6
	EGFP dissector counts and stereological dissector correction
					EGFP +ve neurons		Dissector correction
					117		702
					119		714
					103		618
					136		816
					100		600									Control virus LV: PRS-EGFP (relevant for Figure 1 H)
					115		690	average								EGFP dissector counts and stereological dissector correction
					6.44205		38.6523	SEM
																				EGFP +ve neurons		Dissector correction
	N=5 LCs from 3 different animals that were examined using the dissector method (5-7 weeks after transduction)																			242		1452
																				129		774
																				34		204
																				57		342
																				57		342
	DBH counts: Identified EGFP and DBH positive neurons per animal																			103.8		622.8	average
																				38.0702		228.421	SEM
				EGFP +ve neurons		EGFP+ve and DBH+ve		%
				205		203		99.0244								N=5 LCs from 3 different animals that were examined using the dissector method (5-7 weeks after transduction)
				92		90		97.8261
				253		252		99.6047
				299		293		97.9933
				212.25		209.5		98.6121	average
				44.4398		43.8758		0.423875	SEM
	N=4 LCs from 2 different animals that were examined using confocal microscopy (5-7 weeks after transduction)
Figure 1 C:
	HA counts: Identified EGFP and HA positive neurons per animal
				EGFP +ve neurons		EGFP+ve and DBH+ve		%
				12		10		83.3333
				50		33		66
				50		39		78
				37.3333		27.3333		75.7778	average
				12.6667		8.83805		5.12558	SEM
	N=3 LCs from 3 different animals that were examined (5-7 weeks after transduction)

## Sheet: Figure 1 E
Figure 1 E:		Activation of EGFP positive neurons in response to 3uM PSEM308 in acute pontine slices
	EGFP positive neurons
			Baseline	3uM PSEM308	Washout			N=5 cells from 4 different animals that were examined between 10-14 days after transduction at P21
			0	4.6	0
			0.25	3.1	0.18			RM ANOVA		F (DFn, DFd)			P value		N
			1.1	5.1	1.3					F (1.005, 4.02) = 21.47			P=0.0096		5
			0.43	1.5	0.36
			0.96	6.8	1.22			Bonferroni's multiple comparison				Mean Diff.		95.00% CI of diff.		P Value
			0.548	4.22	0.612	average
			0.209461	0.900777	0.270895	SEM			Baseline vs. 3uM PSEM308			-3.672		-6.879 to -0.4646		0.0316
									Baseline vs. Washout			-0.064		-0.3397 to 0.2117		>0.9999
									3uM PSEM308 vs. Washout			3.608		0.608 to 6.608		0.0266
	EGFP negative neurons
			Baseline	3-10uM PSEM308				N=6 cells from 4 untransduced LCs
			0.235494	0.865237
			0.965845	1.21365				Wilcoxon paired test			P value	N
			1.98562	1.45782				Baseline vs PSEM308			0.6754	6
			0.785316	0.612475
			0.856329	0.632562
			1.41765	0.986542
			1.20215	0.980611	average
			0.224662	0.164124	SEM

## Sheet: Figure 1 F + G
Figure 1 F + G:		Extracellular recordings from LC neurons in anaethetised rats
Figure 1 F:		Local PSEM308 application
	PSEM308 excited units: Discharge frequency is presented							PSEM308 inhibited units							Not responding units								Control: Untransduced LC
			Baseline	PSEM308	Washout					Baseline	PSEM308	Washout					Baseline	PSEM308	Washout						Baseline	PSEM308	Washout
			1.3	5.7	1.3					1.1	0.5	1.6					3.2	2.7	3.2						0.2	0.3	0.3
			0.3	1.5	0.1					2.4	1.8	1					3.1	2.9	2.7						10.9	10.7	9.8
			0	0.7	0					0.2	0	0.2					2	0.9	0.6						1.5	1.5	1.7
			3.4	8	5					6	3.4	5.8					4.1	4.4	3.4						1.9	2	1.5
			4.2	5.5	5					7	5.3	6.1					4.2	5.4	4.7						6.2	7.3	6
			0.2	1.1	0.3					0.3	0.1	0.2					0.2	0.3	0.3						0.083333	0.153482	0
			0	2.1	0.2					2.83333	1.85	2.48333	average				2.8	2.76667	2.48333	average					0.111111	0.111111	0
			0.2	3.2	0.4					1.21014	0.868236	1.11786	SEM				0.613732	0.799861	0.698292	SEM					2.98492	3.15208	2.75714	average
			0.3	13.2	0.6																				1.5492	1.57817	1.41469	SEM
			6.1	8.1	6.7
			5.9	7.3	6
			9.7	17.4	10
			2.63333	6.15	2.96667	average
			0.929511	1.47548	0.983295	SEM
		Wilcoxon paired test			P value	N			Wilcoxon paired test			P value	N			Wilcoxon paired test			P value	N				Wilcoxon paired test			P value	N
		Baseline vs PSEM308			0.0333	12			Baseline vs PSEM308			0.0313	6			Baseline vs PSEM308			>0.9999	6				Baseline vs PSEM308			0.4375	7
Figure 1 G:		Systemic PSEM308 application to PSEM308 excited units
		Discharge frequency is presented
	Time after PSEM308		- 5 min	+ 10 min	+ 20 min	+ 30 min
			0.216667	5.29167	11.0583	13.175
			0.258333	21.6583	22.9917	25.1583
			5.14167	12.8	17.3667	15.4083
			1.16667	1.68333	7.28333	5.225
			0.6	7	15.1167	3.76667
			1.47667	9.68667	14.7633	12.5467	average
			0.931901	3.48999	2.68594	3.86221	SEM
	RM ANOVA		F (DFn, DFd)		P value		N
			F (3, 12) = 8.889		P=0.0022		5
	Bonferroni's multiple comparison				Mean Diff.		95.00% CI of diff.		P Value
			- 5 min vs + 10 min		-8.21		-15.87 to -0.5475		0.034582
			- 5 min vs + 20 min		-13.29		-20.95 to -5.624		0.001258
			- 5 min vs + 30 min		-11.07		-18.73 to -3.407		0.00514

## Sheet: Figure 1 H
Figure 1 H:		Conditioned Place Aversion experiment after Locus coeruleus transduction with LV: PRS-EGFP-2a-PSAM or LV: PRS-EGFP (control)
	Group:	LC PSAM + 10mg/kg PSEM308										Group:			LC GFP + 10mg/kg PSEM308 (control)								Group:	LC PSAM + 5mg/kg PSEM308
				Before pairing			After pairing								Before pairing			After pairing								Before pairing			After pairing
		Compartment		Drug	Saline		Drug	Saline					Compartment		Drug	Saline		Drug	Saline					Compartment		Drug	Saline		Drug	Saline
				303.161	393.275		174.684	643.086							300.627	410.949		308.299	285.825							302	496		332	311
				437.819	263.398		203.605	338.919							291.357	307.491		339.262	389.548							265	403		335	409
				341.625	228.875		253.375	292.075							254.583	181.911		566.55	126.3							703	119		434	289
				106.75	248.975		144.75	716.8							0.475	0.6		216.225	211.825							170	597		216	331
				222	116.75		92.025	248.55							193.525	413.05		86.7	562.525							479	232		212	344
				189.5	499.063		165.1	464.15							333.25	194.5		256.025	90.6							385	246		213	508
				325.3	411.425		219.825	381.2							401.313	436.75		531.5	177.925							316	311		346	367
				275.165	308.823		179.052	440.683	average					average	253.59	277.893		329.223	263.507	average						288	404		671	146
				41.6045	49.4685		19.9722	67.3745	SEM					SEM	48.6686	60.777		64.4985	62.586	SEM						254	369		368	455
																										282	350		326	333
																									average	344.4	352.7		345.3	349.3	average
																									SEM	47.4845	43.1998		43.0904	31.1445	SEM
		2way RM ANOVA		F (DFn, DFd)		P value		N					2way RM ANOVA		F (DFn, DFd)		P value		N					2way RM ANOVA		F (DFn, DFd)		P value		N
		Interaction		F (1, 12) = 9.356		P=0.0099		7					Interaction		F (1, 12) = 1.1		P=0.3148		7					Interaction		F (1, 18) = 0.002616		P=0.9598		10
		Drug		F (1, 12) = 6.878		P=0.0223							Drug		F (1, 12) = 0.082		P=0.7795							Drug		F (1, 18) = 0.02216		P=0.8833
		Bonferroni's multiple comparison				Mean Diff.		95.00% CI of diff.		P Value			Bonferroni's multiple comparison				Mean Diff.		95.00% CI of diff.		P Value			Bonferroni's multiple comparison				Mean Diff.		95.00% CI of diff.		P Value
		Drug vs Saline compartment											Drug vs Saline compartment											Drug vs Saline compartment
				Before pairing		-33.66		-195.1 to 127.8		>0.9999					Before pairing		-8.3		-146.2 to 129.6		>0.9999					Before pairing		-24.3		-225.3 to 176.7		>0.9999
				After pairing		-261.6		-423.1 to -100.2		0.0014					After pairing		-4		-141.9 to 133.9		>0.9999					After pairing		65.72		-135.3 to 266.8		0.8842
