# Supplementary material for: Functional dichotomy in spinal- vs prefrontal-projecting locus coeruleus modules splits descending noradrenergic analgesia from ascending aversion and anxiety in rats
Source: eLife. 2017 Oct 13;6:e29808. doi: 10.7554/eLife.29808 (PMC5653237; doi:10.7554/eLife.29808)
Supplement: Figure 2—source data 1. [file elife-29808-fig2-data1.xlsx]

## Sheet: Figure 2 A
Figure 2 A:		Dissector counts and DBH co-expression for EGFP labelled LC neurons after retrograde transduction from the spinal cord or the prefrontal cortex with CAV2:PRS-EGFP-2a-PSAM
	Dissector formula:						Where N is the estimated number of cells and C the sum of all counted cells.
							The volume fraction is the product of ssf (section sampling factor),									ssf (1:4)		0.25		hsf = dissector volume (12um) / section thickness post processing (18+/-0.7um)
							hsf (hight sampling factor) and asf (area sampling fraction).									hsf		0.666667
							Because all EGFP positive neurons in the LC area were counted the area									asf		N/A
							sampling fraction was omitted from the volume fraction.									volume fraction		0.166667
																Dissector factor		6
	EGFP dissector counts and stereological dissector correction
	LC:PFC								LC:SC
	EGFP +ve neurons		Dissector correction						EGFP +ve neurons		Dissector correction
	86		516						90		540
	87		522						65		390
	15		90						71		426
	45		270						56		336
	81		486						37		222
	47		282						66		396
	60.1667		361	average					58		348
	11.9231		71.5388	SEM					63.2857		379.714	average
									6.08556		36.5133	SEM
	N=6 LCs from 3 different animals that were examined								N=7 LCs from 4 different animals that were examined
	using the dissector method (5-7 weeks after transduction)								using the dissector method (5-7 weeks after transduction)
	DBH counts: Identified EGFP and DBH positive neurons per LC
	LC:PFC								LC:SC
	EGFP +ve neurons		EGFP+ve and DBH+ve		%				EGFP +ve neurons		EGFP+ve and DBH+ve		%
	86		86		100				90		90		100
	87		86		98.8506				65		65		100
	15		15		100				71		70		98.5915
	45		43		95.5556				56		56		100
	81		81		100				37		37		100
	47		47		100				66		66		100
	212.25		209.5		99.0677	average			58		58		100
	44.4398		43.8758		0.727073	SEM			212.25		209.5		99.7988	average
									44.4398		43.8758		0.201207	SEM

## Sheet: Figure 2 B
Figure 2 B:		Hargreaves test
Activation of LC:SC vs LC PFC				Withdrawal latency in seconds is reported
LC:SC	N=9 animals
		Time	mean	SEM		Individual animals										2way RM ANOVA		F (DFn, DFd)		P value
		-15	6.93889	0.370883		7.2	6.5	7.05	7.3	5.55	5.35	7.8	9	6.7		Interaction		F (10, 95) = 4.396		P<0.0001
		0	6.56481	0.388059		8.95	6.55	6.7	4.45	6.25	6.1	6.65	7.1	6.33333		Time		F (5, 95) = 5.942		P<0.0001
		15	10.2759	1.00551		8.56667	9.56667	9.53333	12.2	7.45	10.4333	7.9	17.4	9.43333
		30	11.5963	0.924436		15	9.6	9.16667	12.7	14.2	8.1	9.16667	15.3	11.1333		Bonferroni's multiple comparison				Mean Diff.		95.00% CI of diff.		P Value
		45	10.0667	0.680726		10.9667	8.26667	7.7	9.65	12.6667	9.3	9.03333	13.85	9.16667		Time	Groups
		60	9.24259	0.740611		10.7667	7.65	9.2	10.65	10.7667	6.6	6.25	12.9333	8.36667		-15	Naive N=6 vs. SC N=9			1.122		-1.082 to 3.327		0.4999
																	Naive N=6 vs. PFC N=7			0.4087		-1.918 to 2.736		>0.9999
LC:PFC	N=7 animals															0	Naive N=6 vs. SC N=9			0.5519		-1.652 to 2.756		>0.9999
		Time	mean	SEM		Individual animals											Naive N=6 vs. PFC N=7			-0.6		-2.927 to 1.727		>0.9999
		-15	7.65238	0.530915		7.65	5.8	7.35	9.26667	7.85	9.5	6.15
		0	7.71667	0.574905		6.3	5.6	9.3	8.2	9.76667	7.05	7.8				15	Naive N=6 vs. SC N=9			-2.784		-4.989 to -0.5799		0.0098
		15	8.30238	0.744534		7.65	7.25	11.4	6.56667	10.3	8.85	6.1					Naive N=6 vs. PFC N=7			-0.8107		-3.138 to 1.516		0.8607
		30	8.49286	0.565707		8.9	7.86667	10.7	6.7	10.2	7.73333	7.35
		45	8.43333	0.904391		10.85	5.9	11.05	7	6.56667	11	6.66667				30	Naive N=6 vs. SC N=9			-4.021		-6.226 to -1.817		0.0001
		60	9.09762	0.748777		10.4667	9.85	12.3	7.7	6.3	9	8.06667					Naive N=6 vs. PFC N=7			-0.9179		-3.245 to 1.409		0.7443
																45	Naive N=6 vs. SC N=9			-2.817		-5.021 to -0.6124		0.0089
Naïve	N=6 animals																Naive N=6 vs. PFC N=7			-1.183		-3.51 to 1.144		0.5009
		Time	mean	SEM		Individual animals
		-15	8.06111	0.385012		7.46667	9	7.05	7.2	8.45	9.2					60	Naive N=6 vs. SC N=9			-2.026		-4.23 to 0.1784		0.0781
		0	7.11667	0.417066		9.05	6.9	7.15	7.05	6.35	6.2						Naive N=6 vs. PFC N=7			-1.881		-4.208 to 0.4459		0.1379
		15	7.49167	0.676316		7.3	8.7	6.8	8.05	4.7	9.4
		30	7.575	0.21399		7.85	8.1	7.45	7.05	6.9	8.1
		45	7.25	0.51672		7.6	6.8	5	8.65	8.05	7.4
		60	7.21667	0.427135		7.2	7.1	7.95	8.7	5.65	6.7
Activation of LC:SC ipsi vs contra paw
Comparison between saline and PSEM308 (10mg/kg)
IPSILATERAL
LC:SC ipsi PSEM308 N=9
		Time	mean	SEM		Individual animals
		-15	6.93889	0.370883		7.2	6.5	7.05	7.3	5.55	5.35	7.8	9	6.7		IPSILATERAL
		0	6.82778	0.299897		8.95	6.55	6.7	5.95	6.25	6.1	6.65	7.1	7.2		2way RM ANOVA			F (DFn, DFd)		P value		N
		15	10.2759	1.00551		8.56667	9.56667	9.53333	12.2	7.45	10.4333	7.9	17.4	9.43333		PSEM308 vs Saline							9
		30	11.5963	0.924436		15	9.6	9.16667	12.7	14.2	8.1	9.16667	15.3	11.1333		Time			F (5, 40) = 10.84		P<0.0001
		45	10.0667	0.680726		10.9667	8.26667	7.7	9.65	12.6667	9.3	9.03333	13.85	9.16667		Interaction			F (5, 40) = 8.563		P<0.0001
		60	9.24259	0.740611		10.7667	7.65	9.2	10.65	10.7667	6.6	6.25	12.9333	8.36667
																Bonferroni's multiple comparison				Mean Diff.		95.00% CI of diff.		P Value
																PSEM308 vs Saline
LC:SC IPSI saline N=9																		-15		-0.6815		-2.514 to 1.151		>0.9999
		Time	mean	SEM		Individual animals												0		0.3574		-1.475 to 2.19		>0.9999
		-15	7.62037	0.29059		5.8	7.15	7.6	7.45	7.35	8.6	8.75	7.95	7.93333				15		2.78		0.9468 to 4.612		0.0008
		0	6.47037	0.330133		8.36667	5	5.23333	6.55	6.75	6.5	6.3	6.4	7.13333				30		4.504		2.671 to 6.336		<0.0001
		15	7.4963	0.537346		5.7	5.46667	8.95	9.6	7.5	5.6	8.9	7.15	8.6				45		3.376		1.543 to 5.209		<0.0001
		30	7.09259	0.28774		6	8.15	6.6	8.15	6.13333	7.73333	6.5	7.8	6.76667				60		2.257		0.4246 to 4.09		0.0088
		45	6.69074	0.334121		4.9	6.4	6.85	8.45	6.06667	7.5	6.45	7.3	6.3
		60	6.98519	0.314422		6.45	6.65	7.4	6.93333	5.16667	8.7	6.85	7.35	7.36667
CONTRALATERAL
LC:SC contra PSEM308 N=9
		Time	mean	SEM		Individual animals
		-15	6.94074	0.183188		6.1	7.6	7.65	6.8	7.3	6.75	6.75	7.25	6.26667		CONTRALATERAL
		0	6.49815	0.420588		9	5.25	6.35	5.2	6.9	5.26667	7.3	5.95	7.26667		2way RM ANOVA			F (DFn, DFd)		P value		N
		15	6.66481	0.502205		7.9	4.95	4.7	7.13333	5.4	8.8	6	8.4	6.7		PSEM308 vs Saline							9
		30	7.97407	0.640933		10.4	7.2	6.1	7.26667	9.46667	6.1	5.7	10.7	8.83333		Time			F (5, 40) = 0.5976		P=0.7019
		45	7.41667	0.649947		7.6	5.75	6.4	9.4	9.25	5.3	6.05	10.8	6.2		Interaction			F (5, 40) = 2.547		P=0.0431
		60	6.9037	0.431341		8.6	6.35	5.8	7.5	9.15	5.3	6.4	7	6.03333
																Bonferroni's multiple comparison				Mean Diff.		95.00% CI of diff.		P Value
LC:SC contra saline N=9																PSEM308 vs Saline
		Time	mean	SEM		Individual animals												-15		-0.2444		-1.619 to 1.13		>0.9999
		-15	7.18519	0.55864		7.4	5.73333	6.5	6.9	7	7.16667	5.25	11.1667	7.55				0		-0.1741		-1.548 to 1.2		>0.9999
		0	6.67222	0.308346		8.1	6.6	6.13333	5.4	6.75	5.5	6.53333	7.7	7.33333				15		-0.437		-1.811 to 0.9371		>0.9999
		15	7.10185	0.616125		5.36667	4.75	6.45	7.05	6.65	8.35	6.75	11.15	7.4				30		1.348		-0.02602 to 2.722		0.0572
		30	6.62593	0.607769		5.85	5.95	6.1	5.83333	5.2	6.13333	5.06667	10.2	9.3				45		0.9148		-0.4594 to 2.289		0.4321
		45	6.50185	0.476949		5	7.85	4.7	8.35	6.16667	6.25	5.6	8.6	6				60		-0.5537		-1.928 to 0.8205		>0.9999
		60	7.45741	0.543062		6.1	7.6	8.95	6.2	6.8	8.8	5.7	10.5	6.46667

## Sheet: Figure 2 C + D
Figure 2 C+D:		Confocal analysis of EGFP co-expression for DBH labelled fibres in given regions of the CNS after retrograde transduction from the spinal cord or the prefrontal cortex with CAV2:PRS-EGFP-2a-PSAM
		Field of analysis: 82.01 um x 82.01 um x 10um (z-spacing 0.5 um)
		Primary antibodies: mouse monoclonal anti DBH and chicken anti GFP 1:1000
		Secondary antibodies: Alexa fluo594 goat anti mouse and alexa fluo488 goat anti chicken 1:1000
		The percentage of DBH positive fibres that were also positive for EGFP is reported below
Figure 2 C:		Comparison of ipsilateral and contralateral dorsal horn after unilateral LC:SC transduction
				LC:SC	Dorsal horn
					ipsi	contra
					59.7306	23.8095
					70.3283	32.8385
					63.8704	22.4076
					52.969	26.25
				average	61.7246	26.3264
				SEM	3.64308	2.3113
		Wilcoxon paired test			P value	N
		Baseline vs Atipamezole			0.0286	4
		N=4 animals. Three z-stack per region from different brain sections were examined
Figure 2 D:		Comparison of sevral cortical and spinal regions after LC:SC or LC:PFC transduction
		Cingulate cortex			Somatosensory cortex			Insular cortex			Dorsal horn
		LC:SC	LC:PFC		LC:SC	LC:PFC		LC:SC	LC:PFC		LC:SC	LC:PFC
		1.28205	47.619		1.51515	16.6667		0	10.3175		59.7306	0
		0	56.6077		8.86243	12.6667		1.85185	20.1863		70.3283	2.08333
		2.77778	56.0054		7.08899	12.1212		0	17.274		63.8704	3.0303
	average	1.35328	53.4107		5.82219	13.8182		0.617284	15.9259		64.6431	1.70455
	SEM	0.802666	2.90106		2.21354	1.43292		0.617284	2.92755		3.08358	0.895041
		2way RM ANOVA			F (DFn, DFd)		P value		N
		LC:SC vs LC:PFC							3
		Interaction			F (4, 20) = 159.9		P<0.0001
		Brain area			F (4, 20) = 51.19		P<0.0001
		Bonferroni's multiple comparison				Mean Diff.		95.00% CI of diff.		P Value
		LC:SC vs LC:PFC
				CC		-52.06		-61.62 to -42.5		<0.0001
				SSC		-7.996		-17.56 to 1.564		0.1369
				IC		-15.31		-24.87 to -5.748		0.001
				DHi		62.94		53.38 to 72.5		<0.0001
				VHi		15.96		6.4 to 25.52		0.0006
		N=3 animals. Three z-stack per region from different brain sections were examined
