# Supplementary material for: Functional dichotomy in spinal- vs prefrontal-projecting locus coeruleus modules splits descending noradrenergic analgesia from ascending aversion and anxiety in rats
Source: eLife. 2017 Oct 13;6:e29808. doi: 10.7554/eLife.29808 (PMC5653237; doi:10.7554/eLife.29808)
Supplement: Figure 3—source data 1. [file elife-29808-fig3-data1.xlsx]

## Sheet: Figure 3 D + E
Figure 3 D:		Spinal extracellular recordings from wide dynamic range neurons
		Calibrated forceps applied sustained (5-10 seconds) noxious pinch to hindpaw during spinal drug application															Effect of PSEM308 and Atipamezole on pinch evoked activity (Pinch)
		Baseline			PSEM308			PSEM308+Atipamezole			Washout						RM ANOVA		F (DFn, DFd)		P value		N
			Baseline	Pinch		Baseline	Pinch		Baseline	Pinch		Baseline	Pinch						F (3, 33) = 12.24		P<0.0001		12
			1.1	20.8		0.5	13.1		1.7	10.3		0.533333	19.6667
			7	12.3		5.5	8.6		6.6	11.5		7.85	11.85				Bonferroni's multiple comparison				Mean Diff.		95.00% CI of diff.		P Value
			0.2	25		0	8.7		0.066667	23.5333		0.5	21.6
			1.13333	23.4667		1.46667	13.8667		0.866667	18.5333		1.33333	15.7333						Baseline vs. PSEM		8.017		4.079 to 11.96		<0.0001
			1.76	27.96		3.7	24.5		1.93333	32.2667		1.8	30.8						Baseline vs. PSEM+ATI		2.799		-1.139 to 6.737		0.3261
			0.95	8.8		0.1	2.9		1.73333	8.33333		2.5	5.4						Baseline vs. Washout		1.594		-2.344 to 5.532		>0.9999
			0.666667	13.4		0.95	6.45		0.35	22.5		0.7	19.1						PSEM vs. PSEM+ATI		-5.218		-9.156 to -1.28		0.0044
			0.466667	7.26667		0.866667	3.86667		0.35	2.5		0.8	5.73333						PSEM vs. Washout		-6.424		-10.36 to -2.486		0.0004
			1.2	14.7333		2.13333	8.4		1.26667	12.8667		1.73333	16.5333						PSEM+ATI vs. Washout		-1.205		-5.143 to 2.733		>0.9999
			1.23333	10.5333		0.2	2.8		0.933333	4.06667		0.066667	9.8
			1.25	8.25		1.46667	2.6		1.4	5.53333		1.25	7.3
			5.4	25.7333		5.75	6.25		3.88	12.72		4.6	15.6
		average	1.86333	16.5203		1.88611	8.50278		1.75667	13.7211		1.97222	14.9264				Effect of PSEM308 and Atipamezole on spontaneous activity (Baseline) related to Figure S 3 C
		SEM	0.604379	2.19233		0.584655	1.8162		0.526942	2.57318		0.637289	2.14839
																	RM ANOVA		F (DFn, DFd)		P value		N
																			F (1.896, 20.85) = 0.2265		P=0.7878		12
																	Bonferroni's multiple comparison				Mean Diff.		95.00% CI of diff.		P Value
																			Baseline vs. PSEM		-0.02278		-0.8875 to 0.8419		>0.9999
																			Baseline vs. PSEM+ATI		0.1067		-0.4273 to 0.6407		>0.9999
																			Baseline vs. Washout		-0.1089		-0.7833 to 0.5655		>0.9999
																			PSEM vs. PSEM+ATI		0.1294		-0.9161 to 1.175		>0.9999
																			PSEM vs. Washout		-0.08611		-1.227 to 1.055		>0.9999
																			PSEM+ATI vs. Washout		-0.2156		-0.853 to 0.4219		>0.9999
		Non-noxious brush applied to hindpaw during spinal drug application (N=9 neurons from 5 preparations)															Effect of PSEM308 and Atipamezole on brush evoked activity (Brush)
		Baseline			PSEM308			PSEM308+Atipamezole			Washout						RM ANOVA		F (DFn, DFd)		P value		N
			Baseline	Brush		Baseline	Brush		Baseline	Brush		Baseline	Brush						F (2, 16) = 0.5348		P=0.5959		9
			0.222222	22.5556		0.2	24.2		0	20.6
			0	24.6667		0.2	33.4		0	32.8		0.2	38.8				Bonferroni's multiple comparison				Mean Diff.		95.00% CI of diff.		P Value
			0.333333	6.66667		1	6		0.25	6.25		0	5
			0.333333	35.3333		1.33333	34		1	41.6		1	43.5						Baseline vs. PSEM		1.959		-3.12 to 7.037		0.9539
			0.25	49.75		0.5	44.6667		2.2	37.3333									Baseline vs. PSEM+ATI		1.118		-3.961 to 6.197		>0.9999
			3.8	12.3333		0	9.6		0.833333	14.3333									PSEM vs. PSEM+ATI		-0.8403		-5.919 to 4.239		>0.9999
			0	15.3333		0.142857	11.8571		0.166667	14		0.25	13.125
			0.84375	57.25		1.33333	44.2667		0.375	51.375		2	51.375
			2.66667	22.8		0	21.0714		0	18.3333		0	16.75				Effect of PSEM308 and Atipamezole on spontaneous activity (Baseline)
		average	0.938812	27.4099		0.52328	25.4513		0.536111	26.2917		0.575	28.0917
		SEM	0.451307	5.66184		0.184148	4.85151		0.240907	5.02671		0.322426	7.70294				RM ANOVA		F (DFn, DFd)		P value		N
																			F (2, 16) = 0.5236		P=0.6022		9
																	Bonferroni's multiple comparison				Mean Diff.		95.00% CI of diff.		P Value
																			Baseline vs. PSEM		0.4155		-0.8189 to 1.65		>0.9999
																			Baseline vs. PSEM+ATI		0.4027		-0.8317 to 1.637		>0.9999
																			PSEM vs. PSEM+ATI		-0.01283		-1.247 to 1.222		>0.9999
Figure 3 E		Atipamezole alone (N=5 neruons from 2 preparations for baseline and pinch, N=4 neurons from 2 preparations for brush)
			Baseline			Pinch			Brush
				Baseline	Atipamezole		Baseline	Atipamezole		Baseline	Atipamezole
				1.15	0.133333		5.8	5.8
				1.13333	0.6		23.4667	15.8667		12.3333	5.75
				1.76	2.5		27.96	28.5		49.75	33.8333
				1	0.6		10.7333	13.5333		35.3333	43
				0.95	1.4		8.8	6		6.66667	7.66667
			average	1.19867	1.04667		15.352	13.94		26.0208	22.5625
			SEM	0.145437	0.416547		4.36068	4.15436		10.0487	9.35089
	Wilcoxon paired test			P value	N		P value	N		P value	N
	Baseline vs Atipamezole			0.6875	5		0.75	5		0.875	4
