# Supplementary material for: Functional dichotomy in spinal- vs prefrontal-projecting locus coeruleus modules splits descending noradrenergic analgesia from ascending aversion and anxiety in rats
Source: eLife. 2017 Oct 13;6:e29808. doi: 10.7554/eLife.29808 (PMC5653237; doi:10.7554/eLife.29808)
Supplement: Figure 4—source data 1. [file elife-29808-fig4-data1.xlsx]

## Sheet: Figure 4 A
Figure 4 A:		Conditioned Place Aversion experiment after retrograde transduction of LC:SC and LC:PFC module with CAV2: PRS-EGFP-2a-PSAM
		Time (s) spend in the drug- or saline paired compartment is reported below
	Group:	LC:SC + 10mg/kg PSEM308										Group:	LC:PFC + 10mg/kg PSEM308
				Before pairing			After pairing								Before pairing			After pairing
		Compartment		Drug	Saline		Drug	Saline					Compartment		Drug	Saline		Drug	Saline
				401.107	233.548		304.801	182.507							401.616	340.832		170.301	513.136
				491.702	213.854		288.184	385.678							409.415	326.365		251.417	443.955
				223.751	404.626		308.964	174.798							415.645	256.418		243.137	480.906
				80	714		431.705	305.598							367.293	319.246		266.68	399.82
				167.788	222.171		218.517	395.024							239.067	290.351		229.36	458.753
				208.221	151.639		238.895	197.485							311.404	395.14		311.404	395.14
				214.516	174.307		340.745	230.053							365.673	293.392		387.253	253.746
				255.298	302.021		304.544	267.306	average					average	358.588	317.392		265.65	420.779	average
				53.5433	75.2801		26.4926	35.7909	SEM					SEM	24.0673	16.6927		25.8197	32.042	SEM
		2way RM ANOVA		F (DFn, DFd)		P value		N					2way RM ANOVA		F (DFn, DFd)		P value		N
		Interaction		F (1, 12) = 0.6401		P=0.4392		7					Interaction		F (1, 12) = 14.2		P=0.0027		7
		Drug		F (1, 12) = 0.008977		P=0.9261							Drug		F (1, 12) = 5.433		P=0.0380
		Bonferroni's multiple comparison				Mean Diff.		95.00% CI of diff.		P Value			Bonferroni's multiple comparison				Mean Diff.		95.00% CI of diff.		P Value
		Drug vs Saline compartment											Drug vs Saline compartment
				Before pairing		-46.72		-220.1 to 126.7		>0.9999					Before pairing		41.2		-44.2 to 126.6		0.5202
				After pairing		37.24		-136.1 to 210.6		>0.9999					After pairing		-155.1		-240.5 to -69.73		0.0004

## Sheet: Figure 4 B
Figure 4 B:		Open field experiment after retrograde transduction of LC:SC and LC:PFC module with CAV2: PRS-EGFP-2a-PSAM
	Time in centre (%)											Immobility duration (%)											Total distance (cm)
	Naïve (control)			LC:SC			LC:PFC					Naïve (control)			LC:SC			LC:PFC					Naïve (control)			LC:SC			LC:PFC
		Saline	PSEM308		Saline	PSEM308		Saline	PSEM308				Saline	PSEM308		Saline	PSEM308		Saline	PSEM308				Saline	PSEM308		Saline	PSEM308		Saline	PSEM308
		7.0191	10.8643		9.76693	4.32852		5.10544	0.886918				27.3434	38.2137		27.8579	25.6382		40.9545	74.5011				2517.46	1963.86		1577.21	1889.1		1454.94	592.445
		3.88802	5.28654		8.10211	6.77026		3.55161	0.776053				29.2824	39.227		17.0921	39.1787		35.6271	55.3215				1984.73	3123.24		2365.13	1817.63		1316.01	844.885
		6.04444	7.66667		6.65188	7.54717		11.3208	4.54545				30.8667	41.2222		30.7095	25.8602		22.9745	72.1729				1835.08	1773		1809.65	1998.56		2273.84	689.632
		5.5753	5.48645		7.8714	13.6364		7.10795	1.51044				27.6322	27.4989		38.8027	43.459		37.8721	56.1528				2061.89	1798.14		1356.51	1608.56		2594.48	972.028
		4.57574	4.90893		3.44062	1.7758		13.9938	5.95291				73.7672	22.4789		35.1831	31.8535		21.3683	29.92				785.078	2953.7		1667.4	2148.91		2864.9	1981.16
		7.39671	5.35318		7.76053	1.77384		6.29029	0.199956				40.5598	46.8458		33.7029	37.9157		31.407	81.0264				2068.68	1506.47		1843.25	1500.95		2076.19	387.202
					3.32594	7.54717		5.0422	5.68762							35.1441	36.8479		26.5438	33.7703							1582.78	1650.79		3095.14	1747.66
					14.7268	4.66563										26.2106	32.9482										2618.08	2219.13
					11.8392	11.1111										27.8099	31.6667										2147.93	2214.39
	average	5.74988	6.59434		8.16505	6.57288		7.48744	2.79419			average	38.242	35.9144		30.2792	33.9298		30.9639	57.5521			average	1875.49	2186.4		1885.33	1894.22		2239.36	1030.72
	SEM	0.556337	0.943421		1.22135	1.32887		1.42886	0.944974			SEM	7.37886	3.72049		2.15602	1.99661		2.86573	7.54056			SEM	237.119	276.881		137.296	90.1575		255.672	227.714
	Time in centre (%)											Immobility duration (%)											Total distance (cm)
	2way RM ANOVA			F (DFn, DFd)		P value						2way RM ANOVA			F (DFn, DFd)		P value						2way RM ANOVA			F (DFn, DFd)		P value
	PSEM308 vs Saline											PSEM308 vs Saline											PSEM308 vs Saline
	Interaction			F (2, 19) = 3.53		P=0.0497						Interaction			F (2, 19) = 5.635		P=0.0120						Interaction			F (2, 19) = 9.969		P=0.0011
	Drug			F (1, 19) = 4.937		P=0.0386						Drug			F (1, 19) = 6.542		P=0.0192						Drug			F (1, 19) = 4.218		P=0.0540
	Bonferroni's multiple comparison				Mean Diff.		95.00% CI of diff.		P Value	N		Bonferroni's multiple comparison				Mean Diff.		95.00% CI of diff.		P Value	N		Bonferroni's multiple comparison				Mean Diff.		95.00% CI of diff.		P Value	N
	PSEM308 vs Saline											PSEM308 vs Saline											PSEM308 vs Saline
			Naïve		-0.8445		-4.891 to 3.202		>0.9999	6				Naïve		2.328		-15.7 to 20.36		>0.9999	6				Naïve		-310.9		-1026 to 404.2		0.8037	6
			LC:SC		1.592		-1.712 to 4.896		0.6634	9				LC:SC		-3.651		-18.37 to 11.07		>0.9999	9				LC:SC		-8.898		-592.8 to 575		>0.9999	9
			LC:PFC		4.693		0.947 to 8.44		0.0116	7				LC:PFC		-26.59		-43.28 to -9.894		0.0015	7				LC:PFC		1209		546.6 to 1871		0.0004	7
