# Supplementary material for: Functional dichotomy in spinal- vs prefrontal-projecting locus coeruleus modules splits descending noradrenergic analgesia from ascending aversion and anxiety in rats
Source: eLife. 2017 Oct 13;6:e29808. doi: 10.7554/eLife.29808 (PMC5653237; doi:10.7554/eLife.29808)
Supplement: Figure 5—source data 1. [file elife-29808-fig5-data1.xlsx]

## Sheet: Figure 5 B
Figure 5 B:		Mechanical withdrawal threshold (von Frey) after Tibial nerve transection
Activation of LC:SC / LC PFC vs TNT					50% withdrawal threshold (g) is reported
LC:SC N=6 animals													LC:SC N=6 animals
IPSILATERAL													CONTRALATERAL
		Time	mean	SEM		Individual animals									Time	mean	SEM		Individual animals
Weeks post TNT		W0	15.8692	2.69735		26	10.0855	11.88	11.42	13.55	22.28		Weeks post TNT		W0	12.6241	1.21522		15.1356	12.2088	15.13	9.07	9.07	15.13
		W3	1.095	0.280378		1.02	0.4	0.92	1.84	0.4	1.99				W3	18.52	1.87918		11.42	22.28	17.91	22.28	22.28	14.95
		W4	1.14333	0.232733		1.1	0.68	1.66	1.11	0.4	1.91				W4	19.195	1.72491		18.33	22.24	18.7	22.24	11.42	22.24
Time post PSEM308		-0.05h	1.20833	0.321024		0.92	0.89	2.66	1.46	0.4	0.92		Time post PSEM308		-0.05h	17.3817	1.24803		22.44	14.84	18.33	14.95	14.95	18.78
10mg/kg		0.5h	11.7117	3.33865		8.18	3.67	24.64	10.42	5.03	18.33		10mg/kg		0.5h	20.875	2.53688		11.42	26	26	14.95	24.64	22.24
		1.0h	9.755	1.37894		5.5	8.8	14.23	12.01	6.57	11.42				1.0h	18.4983	2.58502		26.4	18.78	24.64	11.42	11.42	18.33
		1.5h	2.44833	0.692466		1.33	3.13	2.22	1.11	1.35	5.55				1.5h	18.6683	1.73159		18.33	26	12.69	18.33	18.33	18.33
		2.0h	1.46833	0.417025		0.4	1.46	1.99	1.46	0.4	3.1				2.0h	18.57	1.86808		11.42	22.24	22.24	18.33	22.24	14.95
		RM ANOVA		F (DFn, DFd)		P value		N							RM ANOVA		F (DFn, DFd)		P value		N
				F (6, 30) = 13.85		P<0.0001		6									F (5, 25) = 0.324		P=0.8938		6
		Bonferroni's multiple comparison				Mean Diff.		95.00% CI of diff.		P Value					Bonferroni's multiple comparison				Mean Diff.		95.00% CI of diff.		P Value
		Timepoints vs immediately before 10mg/kg PSEM308 i.p. (-0.05h)													Timepoints vs immediately before 10mg/kg PSEM308 i.p. (-0.05h)
				-0.05h vs. W4		0.065		-4.895 to 5.025		>0.9999							-0.05h vs. W4		-1.813		-9.776 to 6.149		>0.9999
				-0.05h vs. 0.5h		-10.5		-15.46 to -5.543		<0.0001							-0.05h vs. 0.5h		-3.493		-11.46 to 4.469		>0.9999
				-0.05h vs. 1h		-8.547		-13.51 to -3.587		0.0002							-0.05h vs. 1h		-1.117		-9.079 to 6.846		>0.9999
				-0.05h vs. 1.5h		-1.24		-6.2 to 3.72		>0.9999							-0.05h vs. 1.5h		-1.287		-9.249 to 6.676		>0.9999
				-0.05h vs. 2h		-0.26		-5.22 to 4.7		>0.9999							-0.05h vs. 2h		-1.188		-9.151 to 6.774		>0.9999
LC:PFC N=6 animals													LC:PFC N=6 animals
IPSILATERAL													CONTRALATERAL
		Time	mean	SEM		Individual animals									Time	mean	SEM		Individual animals
Weeks post TNT		W0	17.3033	2.0752		9.63	19.14	15.78	19.72	14.95	24.6		Weeks post TNT		W0	17.1583	2.35684		11.42	11.42	19.72	13.55	22.24	24.6
		W3	0.963333	0.293674		0.4	0.87	1.99	0.4	1.72	0.4				W3	17.33	2.0006		18.33	22.24	18.33	11.42	11.42	22.24
		W4	0.815	0.180864		0.4	0.99	1.57	0.64	0.89	0.4				W4	19.1333	1.72955		18.33	22.24	22.24	18.33	11.42	22.24
Time post PSEM308		-0.05h	0.885	0.174122		0.4	0.78	1.11	1.4	1.22	0.4		Time post PSEM308		-0.05h	20.7733	1.42928		22.24	18.33	14.95	22.24	24.64	22.24
10mg/kg		0.5h	0.66	0.173973		0.4	0.4	0.96	1.4	0.4	0.4		10mg/kg		0.5h	18.645	1.89734		14.95	26	22.24	14.95	14.95	18.78
		1.0h	0.821667	0.297371		0.4	0.4	0.78	0.68	2.27	0.4				1.0h	17.445	0.752816		14.95	18.73	18.73	18.73	15.2	18.33
		1.5h	0.711667	0.216309		0.4	0.4	1.68	0.99	0.4	0.4				1.5h	18.0683	2.12435		18.73	18.33	22.24	22.24	8.09	18.78
		2.0h	1.26667	0.404332		0.4	0.4	2.64	1.8	1.96	0.4				2.0h	18.2717	2.10522		14.95	22.24	22.24	18.33	9.63	22.24
		RM ANOVA		F (DFn, DFd)		P value		N							RM ANOVA		F (DFn, DFd)		P value		N
				F (5, 25) = 1.289		P=0.2999		6									F (5, 25) = 0.6006		P=0.6999		6
		Bonferroni's multiple comparison				Mean Diff.		95.00% CI of diff.		P Value					Bonferroni's multiple comparison				Mean Diff.		95.00% CI of diff.		P Value
		Timepoints vs immediately before 10mg/kg PSEM308 i.p. (-0.05h)													Timepoints vs immediately before 10mg/kg PSEM308 i.p. (-0.05h)
				-0.05h vs. W4		0.07		-0.677 to 0.817		>0.9999							-0.05h vs. W4		1.64		-4.224 to 7.504		>0.9999
				-0.05h vs. 0.5h		0.225		-0.522 to 0.972		>0.9999							-0.05h vs. 0.5h		2.128		-3.735 to 7.992		>0.9999
				-0.05h vs. 1h		0.06333		-0.6837 to 0.8104		>0.9999							-0.05h vs. 1h		3.328		-2.535 to 9.192		0.6308
				-0.05h vs. 1.5h		0.1733		-0.5737 to 0.9204		>0.9999							-0.05h vs. 1.5h		2.705		-3.159 to 8.569		>0.9999
				-0.05h vs. 2h		-0.3817		-1.129 to 0.3654		0.8339							-0.05h vs. 2h		2.502		-3.362 to 8.365		>0.9999

## Sheet: Figure 5 C
Figure 5 C:		Mechanical withdrawal threshold (von Frey) after Tibial nerve transection
LC:SC +/- Reboxetine vs TNT					50% withdrawal threshold (g) is reported
LC:SC N=6 animals													LC:SC N=6 animals
IPSILATERAL + PSEM308 10mg/kg													IPSILATERAL + PSEM308 10mg/kg + Reboxetine (1mg/kg)
		Time	mean	SEM		Individual animals									Time	mean	SEM		Individual animals
Weeks post TNT		W0	15.8692	2.69735		26	10.0855	11.88	11.42	13.55	22.28		Weeks post TNT		W0	15.8692	2.69735		26	10.0855	11.88	11.42	13.55	22.28
		W3	1.095	0.280378		1.02	0.4	0.92	1.84	0.4	1.99				W3	1.095	0.280378		1.02	0.4	0.92	1.84	0.4	1.99
		W4	1.14333	0.232733		1.1	0.68	1.66	1.11	0.4	1.91				W4	1.23	0.397274		0.4	0.4	2.64	1.99	0.4	1.55
Time post PSEM308		-0.05h	1.20833	0.321024		0.92	0.89	2.66	1.46	0.4	0.92		Time post PSEM308		-0.05h	0.9	0.251171		0.4	0.4	1.11	1.91	0.4	1.18
10mg/kg		0.5h	11.7117	3.33865		8.18	3.67	24.64	10.42	5.03	18.33		10mg/kg		0.5h	17.7617	3.19096		10.04	10.03	22.24	26	12.26	26
		1.0h	9.755	1.37894		5.5	8.8	14.23	12.01	6.57	11.42				1.0h	18.6133	2.90246		15.55	12.26	22.24	26	9.63	26
		1.5h	2.44833	0.692466		1.33	3.13	2.22	1.11	1.35	5.55				1.5h	13.565	2.69252		6.63	13.06	22.24	15.13	5.55	18.78
		2.0h	1.46833	0.417025		0.4	1.46	1.99	1.46	0.4	3.1				2.0h	5.26667	1.48525		1.46	5.57	4.24	8.88	1.42	10.03
		4.0h	0.713333	0.107693		0.68	0.4	0.89	0.99	0.4	0.92				4.0h	1.95333	0.500164		0.99	1.33	1.11	2.37	1.68	4.24
									2way RM ANOVA		F (DFn, DFd)		P value		N
									Treatment		F (8, 40) = 20.64		P<0.0001		6
									Interaction		F (8, 40) = 11.06		P<0.0001
									Bonferroni's multiple comparison				Mean Diff.		95.00% CI of diff.		P Value
									PSEM308 vs PSEM308 + reboxetine
											W4		0.08667		-3.717 to 3.891		>0.9999
											-0.05h		-0.3083		-4.112 to 3.496		>0.9999
											0.5h		6.05		2.246 to 9.854		0.0003
											1.0h		8.858		5.054 to 12.66		<0.0001
											1.5h		11.12		7.313 to 14.92		<0.0001
											2.0h		3.798		-0.005551 to 7.602		0.0506
											4.0h		1.24		-2.564 to 5.044		>0.9999
Other data on graph
LC:SC N=6 animals													Sham N=6 animals
IPSILATERAL Reboxetine (1mg/kg)													IPSILATERAL PSEM308 (10mg/kg)
		Time	mean	SEM		Individual animals									Time	mean	SEM		Individual animals
Weeks post TNT		W0	17.4333	2.64915		9.63	11.88	25.21	14.95	18.33	24.6		Weeks post TNT		W0	18.2317	1.75252		18.78	22.28	11.42	19.72	14.95	22.24
		W3	0.71	0.21265		0.82	0.4	0.4	1.72	0.52	0.4				W3	19.1117	1.10615		18.33	18.33	22.24	22.24	18.33	15.2
		W4	0.803333	0.252582		0.48	1.3	0.4	0.4	1.84	0.4				W4	17.6083	1.63791		22.24	12.69	14.95	22.24	18.33	15.2
Time post PSEM308		-0.05h	0.591667	0.191667		1.55	0.4	0.4	0.4	0.4	0.4		Time post PSEM308		-0.05h	17.93	1.11623		18.78	14.95	18.33	22.24	18.33	14.95
10mg/kg		0.5h	0.995	0.381748		1.61	2.64	0.4	0.4	0.52	0.4		10mg/kg		0.5h	18.5567	1.61471		18.78	18.33	22.24	22.24	18.33	11.42
		1.0h	1.12333	0.447993		1.68	3.13	0.48	0.4	0.65	0.4				1.0h	16.7667	2.02347		11.42	22.24	18.33	22.24	11.42	14.95
		1.5h	0.668333	0.178557		0.4	1.42	0.4	0.4	0.99	0.4				1.5h	17.1733	2.20869		11.42	18.73	22.24	22.24	18.78	9.63
		2.0h	0.783333	0.258775		0.99	1.99	0.4	0.52	0.4	0.4				2.0h	17.4033	1.19962		14.95	14.95	22.24	18.78	18.33	15.17
		RM ANOVA		F (DFn, DFd)		P value		N							RM ANOVA		F (DFn, DFd)		P value		N
				F (5, 25) = 0.8644		P=0.5186		6									F (5, 25) = 0.2147		P=0.9530		6
		Bonferroni's multiple comparison				Mean Diff.		95.00% CI of diff.		P Value					Bonferroni's multiple comparison				Mean Diff.		95.00% CI of diff.		P Value
		Timepoints vs immediately before 10mg/kg PSEM308 i.p. (-0.05h)													Timepoints vs immediately before 10mg/kg PSEM308 i.p. (-0.05h)
				-0.05h vs. W4		-0.2117		-1.058 to 0.6344		>0.9999							-0.05h vs. W4		0.3217		-4.971 to 5.615		>0.9999
				-0.05h vs. 0.5h		-0.4033		-1.249 to 0.4427		0.9794							-0.05h vs. 0.5h		-0.6267		-5.92 to 4.666		>0.9999
				-0.05h vs. 1h		-0.5317		-1.378 to 0.3144		0.4604							-0.05h vs. 1h		1.163		-4.13 to 6.456		>0.9999
				-0.05h vs. 1.5h		-0.07667		-0.9227 to 0.7694		>0.9999							-0.05h vs. 1.5h		0.7567		-4.536 to 6.05		>0.9999
				-0.05h vs. 2h		-0.1917		-1.038 to 0.6544		>0.9999							-0.05h vs. 2h		0.5267		-4.766 to 5.82		>0.9999

## Sheet: Figure 5 D
Figure 5 D:		Mechanical withdrawal threshold (von Frey) and Cold withdrawal frequency (% of 5 presentations of acetone) after Tibial nerve transection
	Activation of LC:SC vs TNT Mechanical allodynia												Activation of LC:SC vs TNT Cold allodynia
	PSEM308	Baseline	0mg/kg	1mg/kg	5mg/kg	10mg/kg		10mg/kg	10mg/kg	i.p.			PSEM308	Baseline	0mg/kg	1mg/kg	5mg/kg	10mg/kg		10mg/kg	10mg/kg	i.p.
	Yohimbine	-	-	-	-	-		0	60ng	i.t.			Yohimbine	-	-	-	-	-		0	60ng	i.t.
		26	1.02	3.11	6.04	10.78		10.31	2.01					0	80	40	40	40		40	100
		10.0855	0.4	0.99	8.03	13.55		4.24	0.68					20	100	100	60	40		60	80
		11.88	0.92	10.31	14.95	9.07		18.91	2.27					40	80	40	60	40		20	100
		11.42	1.84	2.47	7.27	11.42		11.42	0.4					20	100	80	40	20		60	80
		13.55	0.4	0.4	4.39	5.99		5.03	0.4					0	80	80	40	20		60	80
		15.48	5.03	7.47	15.2	9.63								0	80	40	20	60
	average	14.7359	1.60167	4.125	9.31333	10.0733		9.982	1.152				average	13.3333	86.6667	63.3333	43.3333	36.6667		48	88
	SEM	2.3778	0.718825	1.60121	1.89033	1.03725		2.63986	0.408649				SEM	6.66667	4.21637	10.8525	6.14636	6.14636		8	4.89898
	Dose response effect												Dose response effect
		RM ANOVA		F (DFn, DFd)		P value		N						RM ANOVA		F (DFn, DFd)		P value		N
				F (4, 20) = 11.24		P<0.0001		6								F (4, 20) = 16.74		P<0.0001		6
		Bonferroni's multiple comparison				Mean Diff.		95.00% CI of diff.		P Value				Bonferroni's multiple comparison				Mean Diff.		95.00% CI of diff.		P Value
		Comparing each timepoint was every other timepoint												Comparing each timepoint was every other timepoint
				Baseline vs. 0		13.13		6.245 to 20.02		<0.0001						Baseline vs. 0		-73.33		-103.6 to -43.09		<0.0001
				Baseline vs. 1		10.61		3.722 to 17.5		0.001						Baseline vs. 1		-50		-80.25 to -19.75		0.0004
				Baseline vs. 5		5.423		-1.467 to 12.31		0.2206						Baseline vs. 5		-30		-60.25 to 0.2464		0.053
				Baseline vs. 10		4.663		-2.227 to 11.55		0.454						Baseline vs. 10		-23.33		-53.58 to 6.913		0.245
				0 vs. 1		-2.523		-9.413 to 4.366		>0.9999						0 vs. 1		23.33		-6.913 to 53.58		0.245
				0 vs. 5		-7.712		-14.6 to -0.8223		0.021						0 vs. 5		43.33		13.09 to 73.58		0.0021
				0 vs. 10		-8.472		-15.36 to -1.582		0.0094						0 vs. 10		50		19.75 to 80.25		0.0004
				1 vs. 5		-5.188		-12.08 to 1.701		0.2768						1 vs. 5		20		-10.25 to 50.25		0.5008
				1 vs. 10		-5.948		-12.84 to 0.941		0.1311						1 vs. 10		26.67		-3.58 to 56.91		0.1155
				5 vs. 10		-0.76		-7.649 to 6.129		>0.9999						5 vs. 10		6.667		-23.58 to 36.91		>0.9999
	Effect of inthrathecal yohimbine												Effect of inthrathecal yohimbine
		Paired t-test					P value	N						Paired t-test					P value	N
		PSEM308 + vehicle vs PSEM308+ yohimbine					0.0201	5						PSEM308 + vehicle vs PSEM308+ yohimbine					0.0341	5

## Sheet: Figure 5 E
Figure 5 E:		Rotarod test
		Latency to fall in seconds is reported below
			Saline	PSEM308
			39	84		Paired t-test			P value	N
			32	97		PSEM308 vs Saline			0.14	7
			12	11
			60	33
			15	8
			105	129
			75	141
		average	48.2857	71.8571
		SEM	12.7647	20.7691
