# Supplementary material for: Functional dichotomy in spinal- vs prefrontal-projecting locus coeruleus modules splits descending noradrenergic analgesia from ascending aversion and anxiety in rats
Source: eLife. 2017 Oct 13;6:e29808. doi: 10.7554/eLife.29808 (PMC5653237; doi:10.7554/eLife.29808)
Supplement: Figure 6—source data 1. [file elife-29808-fig6-data1.xlsx]

## Sheet: Figure 6 D
Figure D C:		Spinal extracellular recordings after Tibial nerve transection and transduction of the LC:SC output module
		N= 13 cells from 5 animals
	Difference in average discharge frequency over one second										Difference in average discharge frequency over two seconds										Difference in average discharge frequency over five seconds										Difference in average discharge frequency over fourty seconds before and after acetone (~200ul)
	before and during brush										before and during vF fillament application										before and during pinch 70-80g/mm2										Baseline values are used to determine spontaneous discharge frequency
	Saline baseline	Saline brush	PSEM Baseline	PSEM brush	PSEM+ATI baseline	PSEM+ATI brush	Saline baseline	Saline brush			Saline baseline	Saline vF	PSEM Baseline	PSEM vF	PSEM+ATI baseline	PSEM+ATI vF	Saline baseline	Saline vF			Saline baseline	Saline pinch	PSEM Baseline	PSEM Pinch	PSEM+ATI baseline	PSEM+ATI pinch	Saline baseline	Saline pinch			Saline baseline	Saline acetone	PSEM Baseline	PSEM acetone	PSEM+ATI baseline	PSEM+ATI acetone	Saline baseline	Saline acetone
	0	25	0	10	0	25	0.25	18.75			-0.166667	8.33333	0.666667	4.5	0.5	5.83333	0.392857	3.57143			-0.1	12.9	-0.133333	3.33333	-0.0666667	15	0.0833333	5.8			0.125	2.825	2.18333	0.15	1.725	0.05	2.6	0.05
	0.166667	4.5	0	0.333333	0.333333	8.33333	0.125	4.75			0.25	3	0.666667	1.33333	0.166667	3.83333	-0.0294118	3.58824			0	3.4	0	0.866667	0.0666667	5.2	0.08	6.54			0.025	2.375	0.1	0.45	0.25	2.675	0.125	2.475
	0	13.5	0	6.8	0	21	0	8.25			0.166667	7.16667	-0.25	1.5	0	4.5	0	3.66667			-0.1	9.3	0	1.8	2.7	10.8	-2.3	5.7			0.425	9.8	0.025	3.225	0.275	6.25	2.325	5.8
	0	1.6	0	0.6	0	5.33333	0.25	1.5			0.166667	0.666667	0	0	0.166667	2	0	0.166667			0	1.4	0	0	0	5.8	0	1.6			0.025	0.15	0.025	0.075	0.025	1.2	0.15	0.35
	0	1	0	0.5	0	0.5	0	0.333333			-0.166667	0.5	-0.125	0.125	-0.166667	0.5	0	1.5			0	5.9	0	0	0	3.6	-0.1	6.5			0.1	0.225	0	0.15	0.05	0.375	0	0.1
	-0.285714	7.85714	0	4.6	0	9.33333	0	6			0.166667	3.5	-0.375	0.625	0.833333	3.33333	0.666667	2.66667			0	9.2	0.1	4.3	0	6.4	-0.0666667	12.1167			0.1	0.85	0.125	1.225	0.225	1	0.225	0.675
	0	6	-0.2	3.6	1.66667	18.3333	0.4	6.4			0.2	2.3	-0.25	0.875	0	2.5	-0.125	1.75			0.6	13.6	0	10.2	-0.6	12.2	0.4	7.7			0.775	3.175	1.05	0.625	1.025	3.125	0.575	3.925
	1.8	10	1.2	5	0	28.3333	-1	16.75			-0.7	3.6	-0.166667	2.5	0	2.16667	-0.333333	4.16667			-0.7	20.8	1.11022e-16	12.8	0.3	27	-0.1	13.1			4.125	10.05	1.75	2	2.75	7	2.625	5.8
	0.75	7.75	-0.2	2.2	0.5	6	0.75	4.25			-0.7	1.9	-0.333333	0	0	2.33333	-0.875	1.625			-0.8	3.5	-0.6	0.5	0.5	2.8	0.4	3.2			2.125	8.35	3.7	3.2	1.25	2.025	1.55	3.3
	0.166667	7.16667	-0.166667	3.16667	-0.2	4.6	0.25	5.5			-0.1	3.2	-0.5	0.5	-0.333333	2.16667	0.333333	2.16667			-0.05	3.95	-0.4	3.06667	0.133333	2.06667	-0.15	2.9			0.675	0.875	0.2	0.4	0.275	0.9	0.5	0.725
	0	13.3333	-0.25	4.25	-0.25	5	-0.25	8			0.1	8.8	-0.25	0.875	0.333333	2.83333	-0.166667	5.5			-0.6	8.05	-0.733333	5.4	-0.133333	2.4	-0.2	4.25			0.125	0.825	0.225	0.7	0.3	0.825	0.175	0.725
	0.5	30.75	0.333333	14	-1.5	29	0	20.6667			0	16	0	9	0.5	12.1667	-0.2	12.6			-0.65	30.85	0.133333	10.6667	-0.2	19.9333	-1.25	18.4			0.9	2.375	0.75	1.175	0.525	1.2	0.75	0.9
	0	7.85714	0	5.57143	0.333333	9.66667	0	6.6			0.666667	5.83333	0.125	4.625	1	6.08333	0.0714286	5.85714			0	3.8	0.05	4.05	-0.133333	8.6	-0.05	11.7			0.075	1.625	0.2	0.525	0.3	1.075	0.325	0.825
	0.238278	10.4857	0.0551282	4.66319	0.0679487	13.1103	0.0596154	8.28846			-0.00897436	4.98462	-0.0608974	2.03526	0.230769	3.86538	-0.0203943	3.75578			-0.184615	9.74231	-0.121795	4.38333	0.197436	9.36923	-0.250256	7.65436			0.738462	3.34615	0.794872	1.06923	0.690385	2.13077	0.917308	1.97308
	0.148747	2.3965	0.103833	1.08416	0.188491	2.74133	0.111572	1.77586			0.103923	1.18569	0.100923	0.721716	0.107647	0.817452	0.103484	0.862919			0.108956	2.30443	0.0765017	1.1894	0.22051	2.091	0.203513	1.34433			0.325685	0.998179	0.31141	0.302012	0.221854	0.603045	0.276053	0.578594
	Effect of PSEM308 and Atipamezole on brush evoked activity										Effect of PSEM308 and Atipamezole on fillament evoked activity										Effect of PSEM308 and Atipamezole on pinch evoked activity										Effect of PSEM308 and Atipamezole on acetone evoked activity										Effect of PSEM308 and Atipamezole on spontaneous activity
	RM ANOVA		F (DFn, DFd)		P value		N				RM ANOVA		F (DFn, DFd)		P value		N				RM ANOVA		F (DFn, DFd)		P value		N				RM ANOVA		F (DFn, DFd)		P value		N				RM ANOVA		F (DFn, DFd)		P value		N
			F (3, 36) = 11.1		P<0.0001		13						F (3, 36) = 12.29		P<0.0001		13						F (3, 36) = 6.354		P=0.0014		13						F (3, 36) = 6.509		P=0.0012		13						F (3, 36) = 0.3338		P=0.8009		13
	Bonferroni's multiple comparison				Mean Diff.		95.00% CI of diff.		P Value		Bonferroni's multiple comparison				Mean Diff.		95.00% CI of diff.		P Value		Bonferroni's multiple comparison				Mean Diff.		95.00% CI of diff.		P Value		Bonferroni's multiple comparison				Mean Diff.		95.00% CI of diff.		P Value		Bonferroni's multiple comparison				Mean Diff.		95.00% CI of diff.		P Value
	Saline brush vs. PSEM brush				5.823		1.585 to 10.06		0.0029		Saline vF vs. PSEM vF				2.949		1.578 to 4.321		<0.0001		Saline pinch vs. PSEM Pinch				5.359		1.53 to 9.188		0.0024		Saline acetone vs. PSEM acetone				2.277		0.8282 to 3.726		0.0006		Saline acetone vs. PSEM acetone				-0.05641		-0.7251 to 0.6123		>0.9999
	Saline brush vs. PSEM+ATI brush				-2.625		-6.862 to 1.613		0.5538		Saline vF vs. PSEM+ATI vF				1.119		-0.252 to 2.49		0.1723		Saline pinch vs. PSEM+ATI pinch				0.3731		-3.456 to 4.202		>0.9999		Saline acetone vs. PSEM+ATI acetone				1.215		-0.2334 to 2.664		0.1489		Saline acetone vs. PSEM+ATI acetone				0.04808		-0.6206 to 0.7168		>0.9999
	Saline brush vs. Washout pinch				2.197		-2.04 to 6.434		0.9379		Saline vF vs. Washout pinch				1.229		-0.1424 to 2.6		0.1022		Saline pinch vs. Washout pinch				2.088		-1.741 to 5.917		0.8199		Saline acetone vs. Saline acetone				1.373		-0.07568 to 2.822		0.072		Saline acetone vs. Saline acetone				-0.1788		-0.8475 to 0.4898		>0.9999
	PSEM brush vs. PSEM+ATI brush				-8.447		-12.68 to -4.21		<0.0001		PSEM vF vs. PSEM+ATI vF				-1.83		-3.201 to -0.4589		0.004		PSEM Pinch vs. PSEM+ATI pinch				-4.986		-8.815 to -1.157		0.0052		PSEM acetone vs. PSEM+ATI acetone				-1.062		-2.51 to 0.3872		0.2888		PSEM acetone vs. PSEM+ATI acetone				0.1045		-0.5642 to 0.7732		>0.9999
	PSEM brush vs. Washout pinch				-3.625		-7.862 to 0.6118		0.1336		PSEM vF vs. Washout pinch				-1.721		-3.092 to -0.3493		0.0075		PSEM Pinch vs. Washout pinch				-3.271		-7.1 to 0.5582		0.1348		PSEM acetone vs. Saline acetone				-0.9038		-2.353 to 0.5449		0.5404		PSEM acetone vs. Saline acetone				-0.1224		-0.7911 to 0.5462		>0.9999
	PSEM+ATI brush vs. Washout pinch				4.822		0.5847 to 9.059		0.0183		PSEM+ATI vF vs. Washout pinch				0.1096		-1.262 to 1.481		>0.9999		PSEM+ATI pinch vs. Washout pinch				1.715		-2.114 to 5.544		>0.9999		PSEM+ATI acetone vs. Saline acetone				0.1577		-1.291 to 1.606		>0.9999		PSEM+ATI acetone vs. Saline acetone				-0.2269		-0.8956 to 0.4418		>0.9999
	Spinal extracellular recordings after Tibial nerve transection and no vector injection
	N= 8 cells from 2 animals
	Difference in average discharge frequency over one second										Difference in average discharge frequency over two seconds										Difference in average discharge frequency over five seconds										Difference in average discharge frequency over fourty seconds before and after acetone (~200ul)
	before and during brush										before and during vF fillament application										before and during pinch 70-80g/mm2										Baseline values are used to determine spontaneous discharge frequency
	Saline baseline	Saline brush	PSEM Baseline	PSEM brush	PSEM+ATI baseline	PSEM+ATI brush	Saline baseline	Saline brush			Saline baseline	Saline vF	PSEM Baseline	PSEM vF	PSEM+ATI baseline	PSEM+ATI vF	Saline baseline	Saline vF			Saline baseline	Saline pinch	PSEM Baseline	PSEM Pinch	PSEM+ATI baseline	PSEM+ATI pinch	Saline baseline	Saline pinch			Saline baseline	Saline acetone	PSEM Baseline	PSEM acetone	PSEM+ATI baseline	PSEM+ATI acetone	Saline baseline	Saline acetone
	0	39.5	0	43	0	15.8333	0	28.6			0	18	0	14.0714	-0.125	8	0	10.0833			0	11.7333	0	10.55	0	9.66667	0	8.2			0	4.55	0.025	0.875	0	1.15	1.3	1.425
	0	0.166667	0	2.75	0	0.857143	0	1.25			0	0	0	0.25	0	0.857143	0	0.5			0	1.8	0	4.13333	-0.15	2.55	0.25	6.55			0.275	0.125	1.175	0.025	0	0.1	0.475	0.15
	-0.25	44.875	0	49	0	40.7143	0	42.75			-0.166667	8.83333	-0.125	11.875	0	9.33333	0.125	8.0625			-0.1	8.35	-0.0666667	7.2	-0.3	4.55	-0.5	3.25			1.55	2.575	2.025	1.9	0.15	1.725	0.45	1.7
	-0.214286	14.2143	0.25	11.75	-1	13.2	-0.285714	11.1429			0.333333	7.83333	0.125	6.375	-0.125	9.5	-0.1	7.5			0.2	6.93333	-0.2	9.53333	-0.0666667	9.4	0.133333	7.66667			1.35	0.525	1.125	0.5	1.5	0.675	0.15	0.8
	-1.6	14.8	0	12.75	-0.4	10.8	0	9			0	2.375	0	2.9	0.111111	2.11111	0	1.14286			0	6.8	0	5.3	0	4.9	0	4			1	0.1	0.1	0.1	0.2	0	0.9	0.1
	0	3.8	0.142857	4.42857	-0.25	2.25	0	3.57143			-0.333333	1.83333	-0.142857	1.42857	-0.0833333	1.5	0.125	1			-0.133333	2.06667	-0.2	0.75	0.35	1.5	0	0.4			0.125	0.5	0.2	0.325	0	0.175	0.025	0.075
	-0.125	16.25	0	18.4444	-0.166667	7.66667	-0.5	4			-2	2.16667	-1.4375	2.375	0	1.58333	-0.25	0.5			0	6	-0.133333	2.06667	-0.133333	1.2	-0.4	1			0.8	1.4	0.15	0.575	0.025	0.25	0.325	0.25
	-1	0.6	0	4.14286	0.142857	6.42857	-1.42857	13.5714			0	0.0833333	-0.125	0.5	0	0.333333	-0.625	1.875			-0.4	2.1	0.133333	9.2	0.133333	5.53333	-0.8	0.333333			0.225	0.2	0.275	0.325	0.3	0.375	0.275	0.3
	-0.398661	16.7757	0.0491071	18.2832	-0.209226	12.2188	-0.276786	14.2357			-0.270833	5.14063	-0.21317	4.97187	-0.0277778	4.15228	-0.090625	3.83296			-0.0541667	5.72292	-0.0583333	6.09167	-0.0208333	4.9125	-0.164583	3.925			0.665625	1.24687	0.634375	0.578125	0.271875	0.55625	0.4875	0.6
	0.207562	6.00979	0.0337046	6.35406	0.128208	4.45362	0.177259	5.07786			0.255762	2.17815	0.177792	1.88182	0.0281473	1.42358	0.087492	1.41242			0.0604013	1.2508	0.0407031	1.2804	0.0696327	1.1516	0.127726	1.14571			0.209695	0.558167	0.256215	0.21147	0.179871	0.212224	0.148279	0.226434
	Effect of PSEM308 and Atipamezole on brush evoked activity										Effect of PSEM308 and Atipamezole on fillament evoked activity										Effect of PSEM308 and Atipamezole on pinch evoked activity										Effect of PSEM308 and Atipamezole on acetone evoked activity										Effect of PSEM308 and Atipamezole on acetone evoked activity
	RM ANOVA		F (DFn, DFd)		P value		N				RM ANOVA		F (DFn, DFd)		P value		N				RM ANOVA		F (DFn, DFd)		P value		N				RM ANOVA		F (DFn, DFd)		P value		N				RM ANOVA		F (DFn, DFd)		P value		N
			F (3, 21) = 2.106		P=0.1299		8						F (3, 21) = 0.9731		P=0.4241		8						F (3, 21) = 1.775		P=0.1828		8						F (3, 21) = 2.442		P=0.0925		8						F (3, 21) = 0.9453		P=0.4366		8
	Bonferroni's multiple comparison				Mean Diff.		95.00% CI of diff.		P Value		Bonferroni's multiple comparison				Mean Diff.		95.00% CI of diff.		P Value		Bonferroni's multiple comparison				Mean Diff.		95.00% CI of diff.		P Value		Bonferroni's multiple comparison				Mean Diff.		95.00% CI of diff.		P Value		Bonferroni's multiple comparison				Mean Diff.		95.00% CI of diff.		P Value
	Saline brush vs. PSEM brush				-1.507		-9.136 to 6.121		>0.9999		Saline vF vs. PSEM vF				0.1687		-2.468 to 2.805		>0.9999		Saline pinch vs. PSEM Pinch				-0.3688		-3.34 to 2.602		>0.9999		Saline acetone vs. PSEM acetone				0.6688		-0.2136 to 1.551		0.2315		Saline acetone vs. PSEM acetone				0.03125		-0.7296 to 0.7921		>0.9999
	Saline brush vs. PSEM+ATI brush				4.557		-3.072 to 12.19		0.5795		Saline vF vs. PSEM+ATI vF				0.9883		-1.648 to 3.625		>0.9999		Saline pinch vs. PSEM+ATI pinch				0.8104		-2.161 to 3.782		>0.9999		Saline acetone vs. PSEM+ATI acetone				0.6906		-0.1918 to 1.573		0.1993		Saline acetone vs. PSEM+ATI acetone				0.3938		-0.3671 to 1.155		0.8803
	Saline brush vs. Washout pinch				2.54		-5.089 to 10.17		>0.9999		Saline vF vs. Washout pinch				1.308		-1.329 to 3.944		0.9804		Saline pinch vs. Washout pinch				1.798		-1.173 to 4.769		0.5555		Saline acetone vs. Washout pinch				0.6469		-0.2355 to 1.529		0.2683		Saline acetone vs. Washout pinch				0.1781		-0.5828 to 0.939		>0.9999
	PSEM brush vs. PSEM+ATI brush				6.064		-1.564 to 13.69		0.1849		PSEM vF vs. PSEM+ATI vF				0.8196		-1.817 to 3.456		>0.9999		PSEM Pinch vs. PSEM+ATI pinch				1.179		-1.792 to 4.15		>0.9999		PSEM acetone vs. PSEM+ATI acetone				0.02188		-0.8605 to 0.9043		>0.9999		PSEM acetone vs. PSEM+ATI acetone				0.3625		-0.3984 to 1.123		>0.9999
	PSEM brush vs. Washout pinch				4.048		-3.581 to 11.68		0.8236		PSEM vF vs. Washout pinch				1.139		-1.498 to 3.775		>0.9999		PSEM Pinch vs. Washout pinch				2.167		-0.8045 to 5.138		0.2745		PSEM acetone vs. Washout pinch				-0.02188		-0.9043 to 0.8605		>0.9999		PSEM acetone vs. Washout pinch				0.1469		-0.614 to 0.9078		>0.9999
	PSEM+ATI brush vs. Washout pinch				-2.017		-9.646 to 5.612		>0.9999		PSEM+ATI vF vs. Washout pinch				0.3193		-2.317 to 2.956		>0.9999		PSEM+ATI pinch vs. Washout pinch				0.9875		-1.984 to 3.959		>0.9999		PSEM+ATI acetone vs. Washout pinch				-0.04375		-0.9261 to 0.8386		>0.9999		PSEM+ATI acetone vs. Washout pinch				-0.2156		-0.9765 to 0.5453		>0.9999
