# Supplementary material for: Functional dichotomy in spinal- vs prefrontal-projecting locus coeruleus modules splits descending noradrenergic analgesia from ascending aversion and anxiety in rats
Source: eLife. 2017 Oct 13;6:e29808. doi: 10.7554/eLife.29808 (PMC5653237; doi:10.7554/eLife.29808)
Supplement: Figure 7—source data 1. [file elife-29808-fig7-data1.xlsx]

## Sheet: Figure 7 A
Figure 7 A:		Conditioned Place Preference / Aversion experiment after retrograde transduction of LC:SC and LC:PFC module with CAV2: PRS-EGFP-2a-PSAM and TNT nerve injury
		Time (s) spend in the drug- or saline paired compartment is reported below
	Group:	LC:SC + 10mg/kg PSEM308										Group:	LC:PFC + 10mg/kg PSEM308										Group:	SHAM + 10mg/kg PSEM308
				Before pairing			After pairing								Before pairing			After pairing								Before pairing			After pairing
		Compartment		Drug	Saline		Drug	Saline					Compartment		Drug	Saline		Drug	Saline					Compartment		Drug	Saline		Drug	Saline
				388.2	320.8		360	367.4							310.4	447.6		408.6	381.6							381.4	384.12		362.8	451.28
				377	358.6		468.8	277.2							337.6	379.6		337.6	379.6							456.52	267.6		268.72	347.44
				402.2	319.8		398.2	313							363	351		314.6	438.6							394.08	429.72		603.8	174.52
				362.2	294.4		552.8	297.6							422.44	309.52		237.84	376.68							339.96	314.92		221.52	285.88
				361.8	352.2		444	302.8							340.52	374.12		353.32	372.72							231	551.2		252	505.24
				457.4	380.6		546.6	270.4							458.64	337.76		296.28	476.64							280.8	399.8		406.84	184.96
				449.4	282.2		494.4	281.2							348.12	411.56		372	381.52
				364.48	395		579.96	136.92							338	395.8		265.2	465.48
															433.4	296.6		329.76	459.44
				395.335	337.95		480.595	280.815	average					average	372.458	367.062		323.911	414.698	average					average	347.293	391.227		352.613	324.887	average
				13.6171	14.2249		27.5307	23.1938	SEM					SEM	17.3185	16.1984		17.5897	14.7311	SEM					SEM	33.3077	40.1262		57.875	55.5945	SEM
		2way RM ANOVA		F (DFn, DFd)		P value		N					2way RM ANOVA		F (DFn, DFd)		P value		N					2way RM ANOVA		F (DFn, DFd)		P value		N
		Interaction		F (1, 14) = 9.916		P=0.0071		8					Interaction		F (1, 16) = 5.758		P=0.0289		9					Interaction		F (1, 10) = 0.7389		P=0.4102		6
		Drug		F (1, 14) = 50.01		P<0.0001							Drug		F (1, 16) = 12.77		P=0.0025							Drug		F (1, 10) = 0.0231		P=0.8822
		Bonferroni's multiple comparison				Mean Diff.		95.00% CI of diff.		P Value			Bonferroni's multiple comparison				Mean Diff.		95.00% CI of diff.		P Value			Bonferroni's multiple comparison				Mean Diff.		95.00% CI of diff.		P Value
		Drug vs Saline compartment											Drug vs Saline compartment											Drug vs Saline compartment
				Before pairing		57.39		-11.33 to 126.1		0.1157					Before pairing		5.396		-49.48 to 60.27		>0.9999					Before pairing		-43.93		-207.9 to 120.1		>0.9999
				After pairing		199.8		131.1 to 268.5		<0.0001					After pairing		-90.79		-145.7 to -35.91		0.001					After pairing		27.73		-136.3 to 191.7		>0.9999

## Sheet: Figure 7 B
Figure 7 B:		Changes in spontaneous pain after retrograde transduction of LC:SC and LC:PFC module with CAV2: PRS-EGFP-2a-PSAM and TNT nerve injury
		Spontaneous flinches are recorded over a 5min interval after Saline or PSEM308 (10mg/kg) application
	Sham (control)			LC:SC			LC:PFC
		Saline	PSEM308		Saline	PSEM308		Saline	PSEM308
		8	8		41	21		37	41
		8	10		35	16		32	82
		6	9		14	7		14	51
		5	4		22	4		32	66
		4	5		65	22		30	19
		6	8		18	23		18	58
					17	8		17	7
					21	4		65	95
								43	54
	average	6.16667	7.33333		29.125	13.125		32	52.5556
	SEM	0.654047	0.954521		6.09285	2.91815		5.24934	9.29323
	Time in centre (%)
	2way RM ANOVA			F (DFn, DFd)		P value
	PSEM308 vs Saline
	Interaction			F (2, 20) = 10.48		P=0.0008
	Transduction site			F (2, 20) = 11.86		P=0.0004
	Drug			F (1, 20) = 0.2999		P=0.5900
	Bonferroni's multiple comparison				Mean Diff.		95.00% CI of diff.		P Value	N
	PSEM308 vs Saline
			PFC (TNT)		-20.56		-34.89 to -6.218		0.0038	9
			SC (TNT)		16		0.7927 to 31.21		0.0371	8
			Sham		-1.167		-18.73 to 16.39		>0.9999	6

## Sheet: Figure 7 C
Figure 7 B:		Spontaneous pain behaviour vs place preference
		Correlation between the difference of time spend in the drug paired compartment in the post test of the CPP experiment vs
		the PSEM308 induced difference in spontaneous flinches
				Difference footlifts			Difference place preference
				LC:SC	LC:PFC		LC:SC	LC:PFC
				-43			82.2					Pearson r	-0.6562
				-20			-28.2					95% CI	-0.8642 to -0.2564
				-19			91.8					R squared	0.4305
				-18			190.6
				-17			215.48					P value	0.0042
					-11			12.8				Number of Pairs	17
					-10			23.88
				-9			45
				-7			-4
					4			98.2
				5			89.2
					11			-103.24
					30			-72.8
					34			-184.6
					37			-48.4
					40			-162.36
					50			0
