# Supplementary material for: Functional dichotomy in spinal- vs prefrontal-projecting locus coeruleus modules splits descending noradrenergic analgesia from ascending aversion and anxiety in rats
Source: eLife. 2017 Oct 13;6:e29808. doi: 10.7554/eLife.29808 (PMC5653237; doi:10.7554/eLife.29808)
Supplement: Figure 8—source data 1. [file elife-29808-fig8-data1.xlsx]

## Sheet: Figure 7 B
Figure 7 B:		Mechanical withdrawal threshold (von Frey) after Tibial nerve transection
Activation of LC:SC					50% withdrawal threshold (g) is reported
LC:SC 10mg/kg PSEM308 N=7 animals														LC:SC 10mg/kg PSEM308 N=7 animals
IPSILATERAL														CONTRALATERAL
		Time	mean	SEM		Individual animals										Time	mean	SEM		Individual animals
Weeks post TNT		W0	14.4986	1.7855		11.42	22.24	14.95	18.33	8.18	11.42	14.95		Weeks post TNT		W0	14.45	1.77203		14.95	22.24	11.42	18.33	9.63	9.63	14.95
	Vector inj.	W3	0.621429	0.155876		0.4	0.89	0.4	0.4	0.4	1.46	0.4			Vector inj.	W3	16.0957	2.01948		14.95	22.24	11.42	18.78	8.09	22.24	14.95
		W5	0.608571	0.105795		0.99	0.4	0.4	0.68	0.4	0.4	0.99				W5	12.7314	2.24175		18.33	22.24	15.44	9.63	7.65	7.65	8.18
Time post PSEM308		-0.5h	0.524286	0.0870648		0.4	0.68	0.4	0.4	0.4	0.4	0.99		Time post PSEM308		-0.5h	12.5257	1.28055		11.42	12.63	9.63	14.95	12.63	18.33	8.09
10mg/kg		-0.05h	0.54	0.0903696		0.4	0.89	0.4	0.89	0.4	0.4	0.4		10mg/kg		-0.05h	12.15	1.14568		9.63	12.63	9.07	12.36	11.61	18.33	11.42
		0.5h	6.90143	0.956356		4.24	9.07	10.08	9.4	5.73	5.55	4.24				0.5h	13.5786	1.43587		11.95	14.95	18.74	18.33	10.03	11.42	9.63
		1.0h	5.73143	1.33978		2.8	3.57	5.41	4.26	11.88	2.8	9.4				1.0h	13.6171	1.54767		12.63	22.24	12.63	11.42	11.42	14.95	10.03
		1.5h	0.804286	0.317039		0.4	0.4	0.4	0.99	0.4	0.4	2.64				1.5h	14.7929	1.95359		9.63	11.95	12.63	14.95	24.64	18.33	11.42
		2.0h	0.698571	0.146132		0.4	0.89	0.4	1.22	0.4	0.4	1.18				2.0h	13.5629	2.0332		11.95	22.24	11.42	14.95	18.33	9.63	6.42
LC:SC Saline N=7 animals														LC:SC Saline N=7 animals
IPSILATERAL														CONTRALATERAL
		Time	mean	SEM		Individual animals										Time	mean	SEM		Individual animals
Time post Saline		-0.5h	0.827143	0.164689		0.89	1.4	0.99	0.4	0.4	0.4	1.31		Time post Saline		-0.5h	13.9757	1.30265		15.2	14.95	15.12	15.2	7.61	18.33	11.42
		-0.05h	0.652857	0.144003		0.4	0.68	1.4	0.4	0.4	0.4	0.89				-0.05h	14.2414	1.45977		12.63	14.95	18.78	14.95	8.18	18.78	11.42
		0.5h	0.595714	0.128023		0.4	0.4	0.99	0.4	0.4	0.4	1.18				0.5h	13.2943	0.846218		15.2	14.95	15.2	11.42	10.03	14.84	11.42
		1.0h	0.717143	0.173613		0.68	0.4	0.4	1.44	0.4	0.4	1.3				1.0h	13.8829	1.34126		11.42	9.63	18.73	14.84	12.81	18.33	11.42
		1.5h	0.675714	0.182494		0.4	1.18	0.4	0.4	0.4	0.4	1.55				1.5h	11.9057	1.26812		12.63	11.42	18.73	9.63	8.09	11.42	11.42
		2.0h	0.728571	0.159738		0.4	0.68	0.68	0.99	0.4	0.4	1.55				2.0h	13.0314	1.39095		12.63	18.78	12.63	14.95	7.65	14.95	9.63
		2way RM ANOVA		F (DFn, DFd)		P value		N
		Time		F (5, 30) = 17.14		P<0.0001		7
		Treatment		F (1, 6) = 61.74		P=0.0002
		Interaction		F (5, 30) = 17.96		P<0.0001
		Bonferroni's multiple comparison				Mean Diff.		95.00% CI of diff.		P Value
		Saline ipsi - PSEM308 ipsi
				-0.5h		0.3029		-1.693 to 2.299		>0.9999
				-0.05h		0.1129		-1.883 to 2.109		>0.9999
				0.5h		-6.306		-8.302 to -4.31		<0.0001
				1.0h		-5.014		-7.01 to -3.018		<0.0001
				1.5h		-0.1286		-2.125 to 1.868		>0.9999
				2.0h		0.03		-1.966 to 2.026		>0.9999

## Sheet: Figure 7 C
Figure 7 C:		Mechanical withdrawal threshold (von Frey) and Cold withdrawal frequency (% of 5 presentations of acetone) after Tibial nerve transection
	Activation of LC:SC vs TNT Mechanical allodynia												Activation of LC:SC vs TNT Cold allodynia
	IPSI						CONTRA						IPSI						CONTRA
	PSEM308	Baseline	10mg/kg	10mg/kg	i.p.		Baseline	10mg/kg	10mg/kg	i.p.			PSEM308	Baseline	10mg/kg	10mg/kg	i.p.		Baseline	10mg/kg	10mg/kg	i.p.
	Atipamezole	-	0	50ug	i.t.		-	0	50ug	i.t.			Atipamezole	-	0	50ug	i.t.		-	0	50ug	i.t.
		0.695	5.58	0.99			12.29	12.63	7.6					100	40	80			10	20	60
		0.6	14.46	1.55			18.33	14.95	11.42					90	20	80			30	20	60
		0.54	8.6	0.4			10.525	11.42	10.08					70	40	80			10	20	40
		0.54	5.41	1.55			17.095	9.63	11.42					100	20	100			0	0	100
		0.4	4.46	0.99			8.135	6.42	12.63					90	40	80			10	20	20
		0.4	7.3	1.18			18.555	24.64	8.08					70	80	100			20	40	60
	average	0.529167	7.635	1.11			14.155	13.2817	10.205				average	86.6667	40	86.6667			13.3333	20	56.6667
	SEM	0.0469471	1.49308	0.175594			1.81043	2.55671	0.81956				SEM	5.57773	8.94427	4.21637			4.21637	5.16398	10.8525
	2way RM ANOVA		F (DFn, DFd)		P value		N						2way RM ANOVA		F (DFn, DFd)		P value		N
	Interaction		F (2, 20) = 4.294		P=0.0281		7						Interaction		F (2, 20) = 7.138		P=0.0046		7
	Paw		F (1, 10) = 50.72		P<0.0001								Paw		F (1, 10) = 76.91		P<0.0001
	Treatment		F (2, 20) = 6.363		P=0.0073								Treatment		F (2, 20) = 15.43		P<0.0001
	Bonferroni's multiple comparison				Mean Diff.		95.00% CI of diff.		P Value				Bonferroni's multiple comparison				Mean Diff.		95.00% CI of diff.		P Value
	Ipsi								0.0179				Ipsi
	PSEM308 (atipamezole it) vs. PSEM308 (vehicle it)				-6.525		-12.18 to -0.872		>0.9999				PSEM308 (atipamezole it) vs. PSEM308 (vehicle it)				46.67		15.61 to 77.73		0.0017
	PSEM308 (atipamezole it) vs. Baseline				0.5808		-5.072 to 6.234		0.0089				PSEM308 (atipamezole it) vs. Baseline				0		-31.06 to 31.06		>0.9999
	PSEM308 (vehicle it) vs. Baseline				7.106		1.453 to 12.76						PSEM308 (vehicle it) vs. Baseline				-46.67		-77.73 to -15.61		0.0017
	Contra												Contra
	PSEM308 (atipamezole it) vs. PSEM308 (vehicle it)				-3.077		-8.73 to 2.576		0.7609				PSEM308 (atipamezole it) vs. PSEM308 (vehicle it)				36.67		5.607 to 67.73		0.015
	PSEM308 (atipamezole it) vs. Baseline				-3.95		-9.603 to 1.703		0.3252				PSEM308 (atipamezole it) vs. Baseline				43.33		12.27 to 74.39		0.0035
	PSEM308 (vehicle it) vs. Baseline				-0.8733		-6.526 to 4.78		>0.9999				PSEM308 (vehicle it) vs. Baseline				6.667		-24.39 to 37.73		>0.9999

## Sheet: Figure 7 D
Figure 7 D:		Changes in spontaneous pain after retrograde transduction of LC:SC module with CAV2: PRS-EGFP-2a-PSAM after TNT nerve injury
		Spontaneous flinches are recorded over a 5min interval after Saline or PSEM308 (10mg/kg) application
			Saline	PSEM308
			84	9		Paired t-test			P value	N
			55	16		PSEM308 vs Saline			0.0085	7
			64	19
			122	1
			40	43
			138	56
			59	17
		average	80.2857	23
		SEM	13.8576	7.35171
