# Supplementary material for: Functional dichotomy in spinal- vs prefrontal-projecting locus coeruleus modules splits descending noradrenergic analgesia from ascending aversion and anxiety in rats
Source: eLife journal article supplement (doi:10.7554/elife.29808), 2017-10-12
Supplement: supp [file elife_poa_e29808_Figure_1_figure_supplement_2.docx]

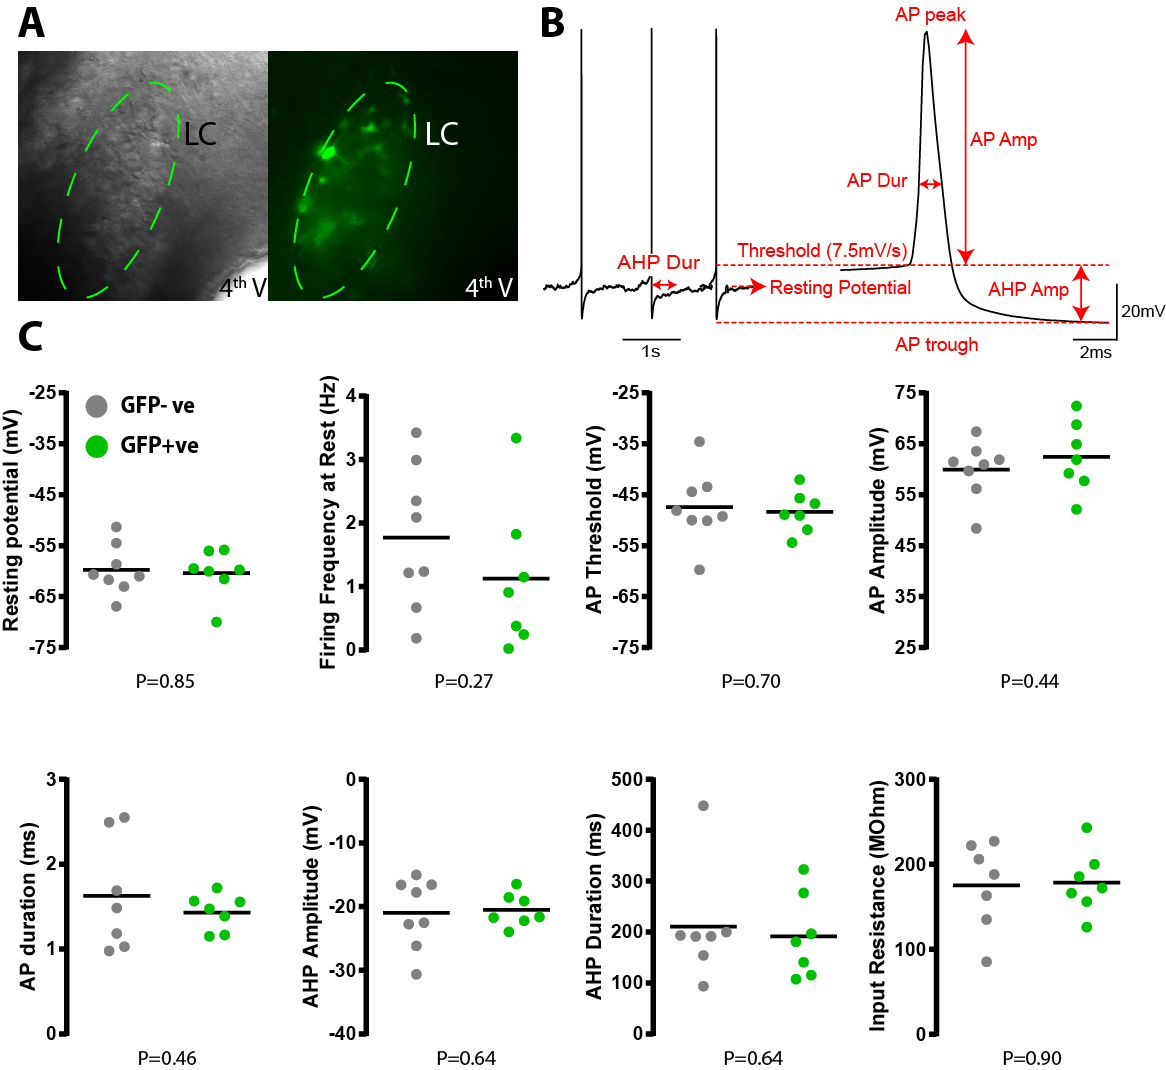


Figure 1 – Supplement 2: Transduction with PSAM does not alter LC neuronal electrophysiological properties. A) *Whole cell current clamp recordings from LC neurons in pontine slices two weeks after in vivo transduction with LVPRS-EGFP-2A-PSAM. B) Schematic of action potential analysis. All spike measurements are taken with reference to the AP threshold defined as the point where velocity of depolarisation exceeded 7.5Vs-1. Data from 25 action potentials were averaged per cell. Input resistance was measured in voltage clamp from the average of 10 current responses to a 10mV membrane hyperpolarization C) No quantitative difference was observed in the intrinsic electrical properties between transduced (N=7) and non-transduced (N=8) LC neurons (unpaired t-test).*
