# Supplementary material for: Functional dichotomy in spinal- vs prefrontal-projecting locus coeruleus modules splits descending noradrenergic analgesia from ascending aversion and anxiety in rats
Source: eLife journal article supplement (doi:10.7554/elife.29808), 2017-10-12
Supplement: supp [file elife_poa_e29808_Figure_1_Figure_Supplement_3.docx]

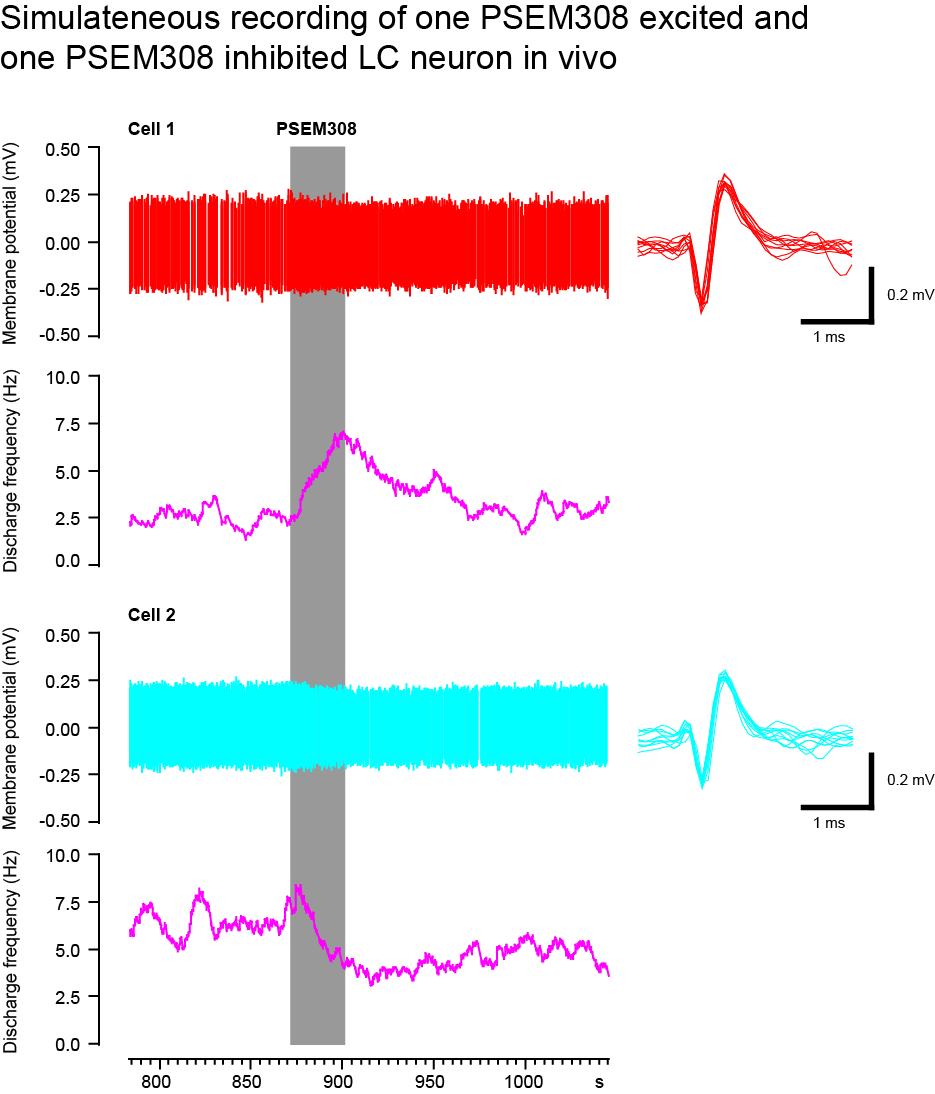


**Figure 1 – Supplement 3:**Simultaneous recording of one excited and one inhibited LC neuron in vivo with focal PSEM308 (1mM) pressure application.
