# Supplementary material for: Functional dichotomy in spinal- vs prefrontal-projecting locus coeruleus modules splits descending noradrenergic analgesia from ascending aversion and anxiety in rats
Source: eLife journal article supplement (doi:10.7554/elife.29808), 2017-10-12
Supplement: supp [file elife_poa_e29808_Figure_7_figure_supplement_1.docx]

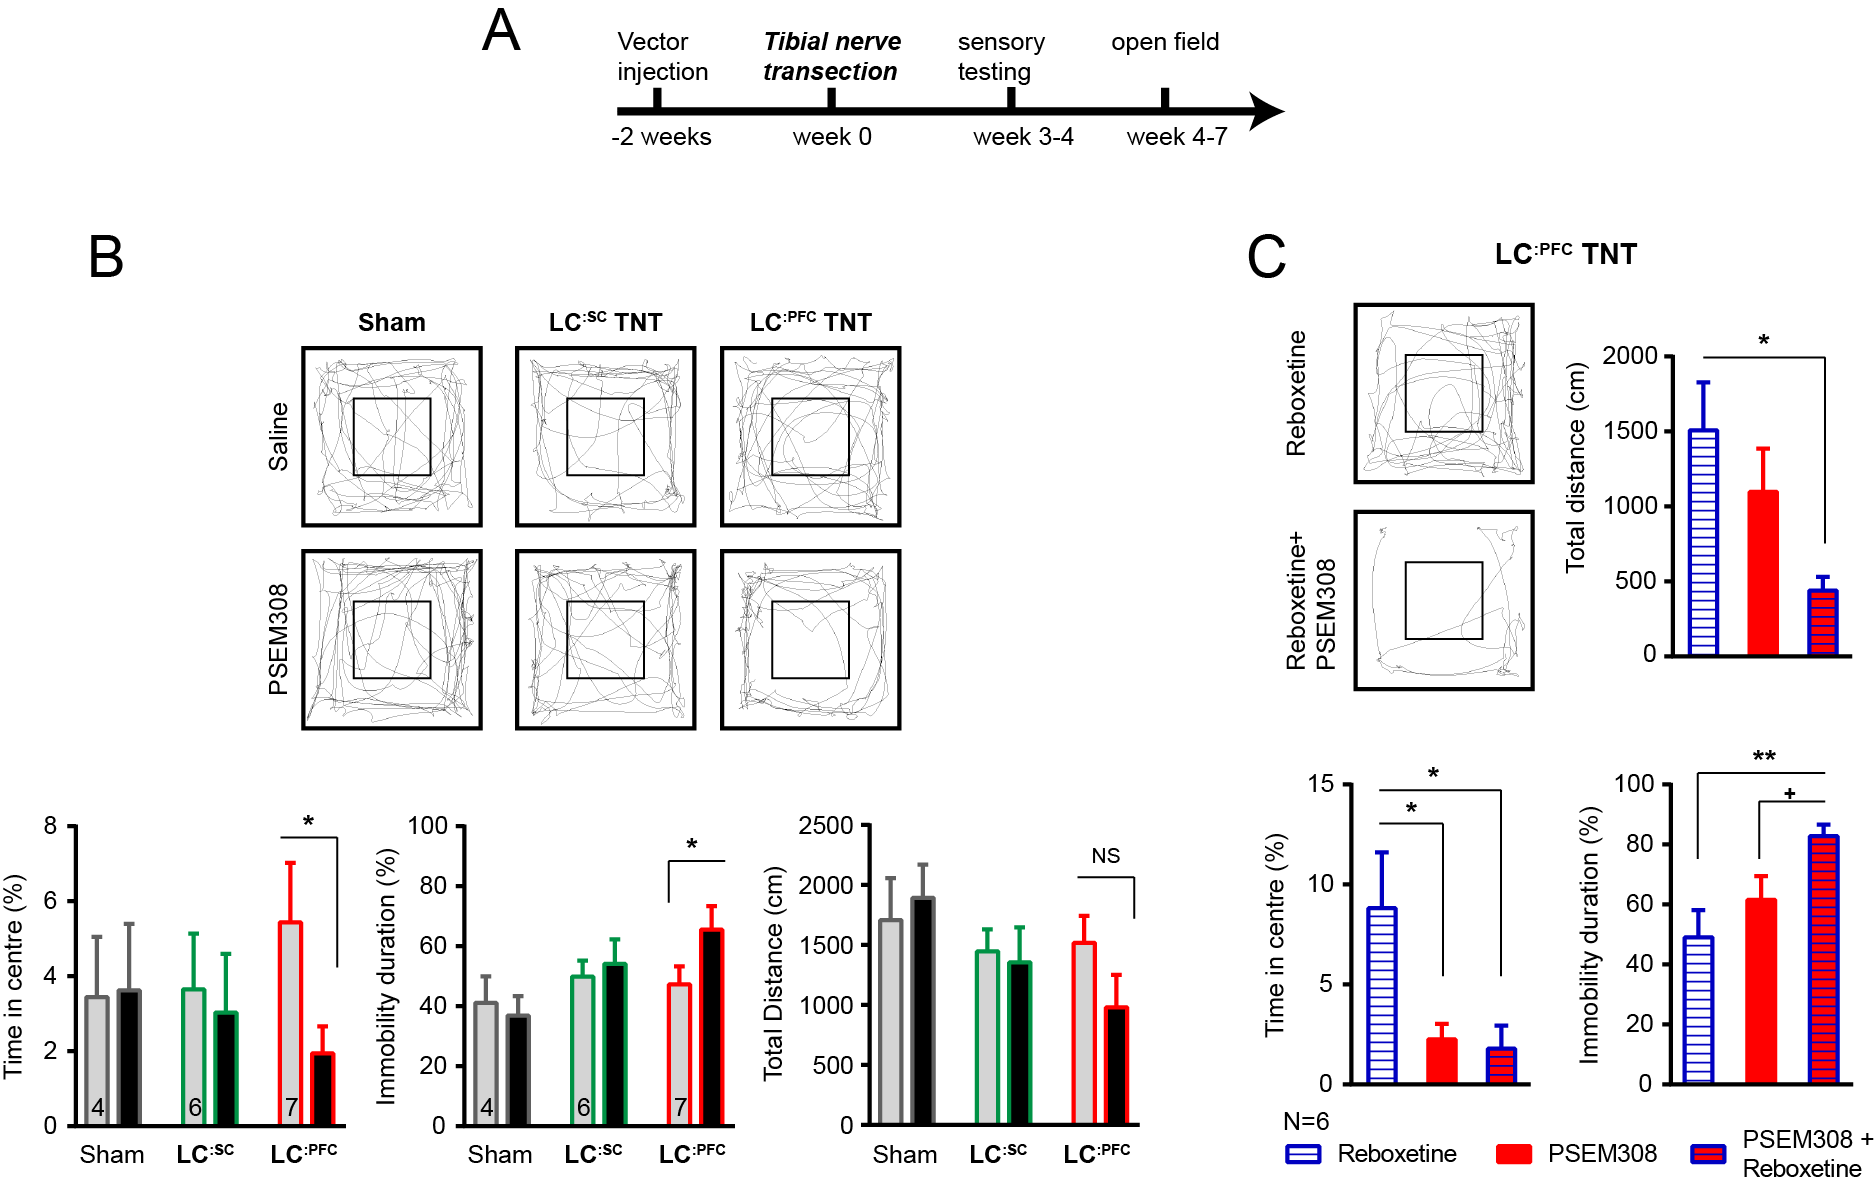


**Figure 7 – Supplement 1: Chemogenetic stimulation of the LC:PFC module is anxiogenic in chronic pain**(A) Timeline of nerve injury and open field testing
(B) Representative heat maps showing activity in the open field test (OFT) after saline or PSEM308 (10 mg/kg) injection for sham, **LC:SC** and **LC:PFC** groups. Chemogenetic activation of **LC:PFC** reduced the time spent in the centre of the arena and increased immobility but PSEM308 had no effect on **LC:SC** transduced rats or sham rats (2-way repeated measures ANOVA with Bonferroni’s multiple comparison PSEM308 vs saline, * P<0.05).
(C) Co-application of reboxetine (1 mg/kg) and PSEM308 (10 mg/kg) in **LC:PFC** rats increased immobility time, decreased the distance travelled and decreased the time spent in the centre of the arena as compared to reboxetine alone.
Co-application of reboxetine and PSEM308 (10 mg/kg) also increased immobility as compared to PSEM308 alone (paired t-test PSEM308 vs PSEM308 + Reboxetine, + P<0.05).
