# Supplementary material for: Functional dichotomy in spinal- vs prefrontal-projecting locus coeruleus modules splits descending noradrenergic analgesia from ascending aversion and anxiety in rats
Source: eLife. 2017 Oct 13;6:e29808. doi: 10.7554/eLife.29808 (PMC5653237; doi:10.7554/eLife.29808)
Supplement: Supplementary file 1. [file elife-29808-supp1.xlsx]

## Sheet: Sheet1
		List of Animals used in electrophysiological and behavioural studies
Study 1:	Effect of chemogentically evoked noradrenaline release on cell activity and sensory threshold and affective behaviours in otherwise naïve rats
Vector injection				Locus Coeruleus	Locus Coeruleus			Spinal cord		Prefrontal cortex		Control naïve
				Lenti-EGFP	Lenti-EGFP-2a-PSAM			CAV2-EGFP-2a-PSAM		CAV2-EGFP-2a-PSAM
				Group 1	Group 1 (p21)	Group 2	Group 3	Group 1	Group 2	Group 1	Group 2	Group 1 (p21)	Group 2	Group 3
Rats entering study				7	8	10	9	8	10	8	7	6	6	4
Rats included in analysis				7	4	10	7	7	9	7	7	4	6	4
CPP			N	7	-	10	7*	7	-	7*	-	-	-	-
			PSEM308	10mg/kg	-	5mg/kg	10mg/kg	10mg/kg	-	10mg/kg	-	-	-	-
Open field			N	-	-	-	-	-	9	-	7	-	6	-
Hargreaves			N	-	-	-	-	-	9	-	7	-	6	-
Slice recordings (success ratio)				-	4/8	-	-	-	-	-	-	4/6	-	-
Cell recordings (success ratio)			N	-	-	3/5	5/6	6/8	-	-	-	-	-	3/4
Histochemistry			N	7	-	10	9	8	10	8	7	-	-	-
Confirmation of transduction				7/7	5/8	10/10	8/9**	7/8**	9/10**	8/8	7/7	-	-	-
* one animal was excluded because it escaped arena during the conditioning session
** one animal was excluded because of low/lack of transduction (<10 neurons)
Study 2:	Effect of chemogentically evoked noradrenaline release on sensory threshold and affective behaviours in nerve injured rats
Vector injection then TNT				Spinal cord	Prefrontal cortex	Control naïve
				CAV2-EGFP-2a-PSAM	CAV2-EGFP-2a-PSAM
				Group 1	Group 1	Group 1
Rats entering study				9	9	6
Rats included in analysis				8	9	6
CPP			N	8	9	-
			PSEM308	10mg/kg	10mg/kg	-
Sensory thresholds			N	6	6	6
Spontaneous flinches			N	8	9	6
Open field			N	6	7	4
Histochemistry			N	9	9	-
Confirmation of transduction				8/9**	9/9	-
** one animal was excluded because of low/lack of transduction (<10 neurons)
Study 3:	Effect of chemogentic activation of the LC:SC module as an intervention for established nerve injury pain
TNT then vector injection				Spinal cord	TNT only
				CAV2-EGFP-2a-PSAM
				Group 1	Group 1
Rats entering study				7	2
Rats included in analysis				7	2
Sensory thresholds			N	7	-
Sponntaneous flinches			N	7	-
Rotarod			N	7	-
Cell recordings (success ratio)				5/7	2/2
Histochemistry			N	7	-
Confirmation of transduction				7/7	-
